# Supplementary material
Source: PubMed Central journal article supplement (PMC4641052)
Supplement: NIHMS726865-supplement-Supplemental_files.pdf [file NIHMS726865-supplement-Supplemental_files.pdf]

## Supplementary Online Content

Ghani M, Reitz C, Cheng R, et al; Alzheimer's Disease Genetics Consortium. Association of long runs of homozygosity with Alzheimer disease among African American individuals. *JAMA Neurol*. Published online September 14, 2015. doi:10.1001/jamaneurol.2015.1700.

**eFigure 1.** Population STRUCTURE Analyses

**eFigure 2.** Consensus Region on chr4q31.3 Associated With AD in the ADGC Data Set

**eFigure 3.** Consensus Region on chr15q24.1.3 Associated With AD in the CHAP-Indianapolis Data Set

**eFigure 4.** Histone Modifications Map of Chromosome 3 From the Roadmap Epigenomics Project

**eTable 1.** A 114-kb Consensus Region Flanked by SNPs rs6817611 and rs7669180 (chr4:152172448-152286356/hg18) Was Overlapped by ROHs>2Mb in 7 Cases and No Controls From the ADGC Data Set

**eTable 2.** A 202-kb Consensus Region Flanked by SNPs rs12442211 and rs11635599 (chr15: 72032728-72235049/hg18) Was Overlapped by >1Mb-ROHs in 5 Cases and No Controls (EMP1=0.0002; EMP2=0.023) From the CHAP-Indianapolis Data Set

**eTable 3.** Gene-Based Analyses of the Entire Data Set Revealed Several Genes on Chr3p21.31 That Were Intersected by ROHs>3Mb Significantly More Frequently in Cases Compared With Controls

**eTable 4.** Nominally Significant Results Obtained in the Entire African American Data Set (AA) Compared With the Nominally Significant Results for the Caribbean Hispanic Data Set (HISP) (547 AD Cases and 542 Controls) Reported in Ghani et al, *JAMA Neurology* 2013

**eTable 5.** List of Nominally Significant Genes Intersected by ROHs in the ADGC and CHAP-Indianapolis (C-I) Data Sets

**eTable 6.** Potentially Damaging SNPs (With Their SIFT and Polyphen Scores For Missense Variants) Within the Canonical Transcripts of the Genes Inside the Consensus Regions Identified in the ADGC and CHAP-Indianapolis Data Sets

This supplementary material has been provided by the authors to give readers additional information about their work.

**eFigure 1. Population STRUCTURE Analyses**

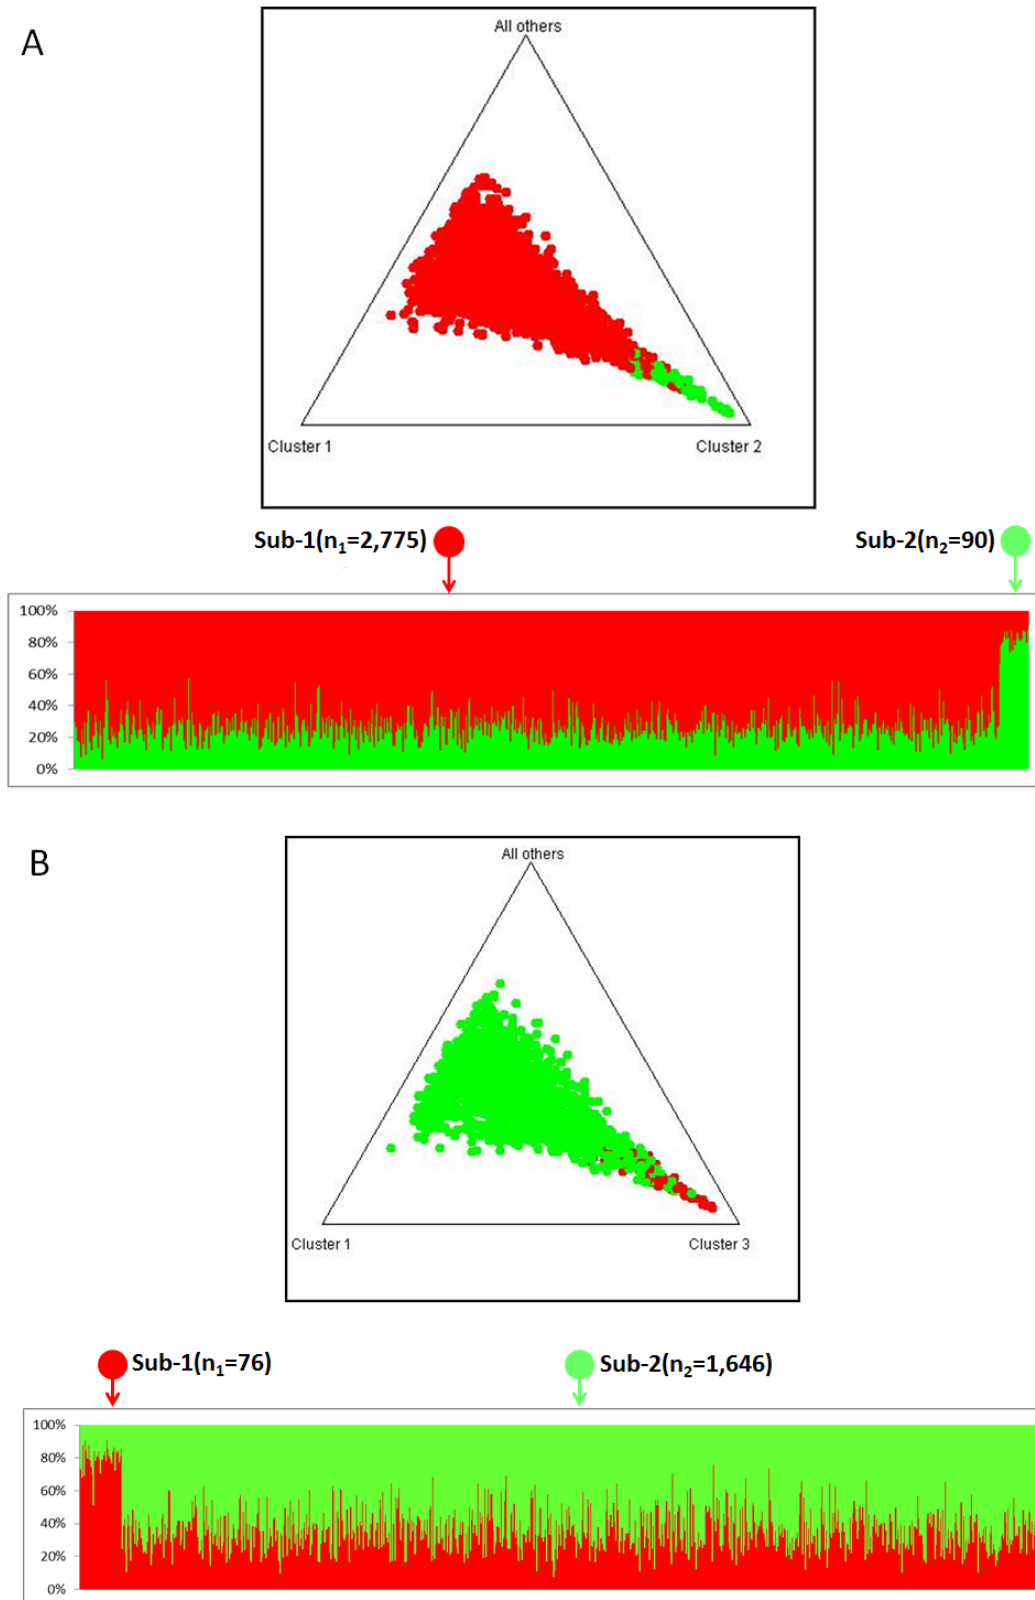

**A.** Detection of 90 outliers in the ADGC dataset (using 452 selected independent SNPs). **B.** Detection of 76 outliers in the CHAP-Indianapolis dataset (using 518 selected independent SNPs).

© 2015 American Medical Association. All rights reserved.

**eFigure 2. Consensus Region on chr4q31.3 Associated With AD in the ADGC Data Set**

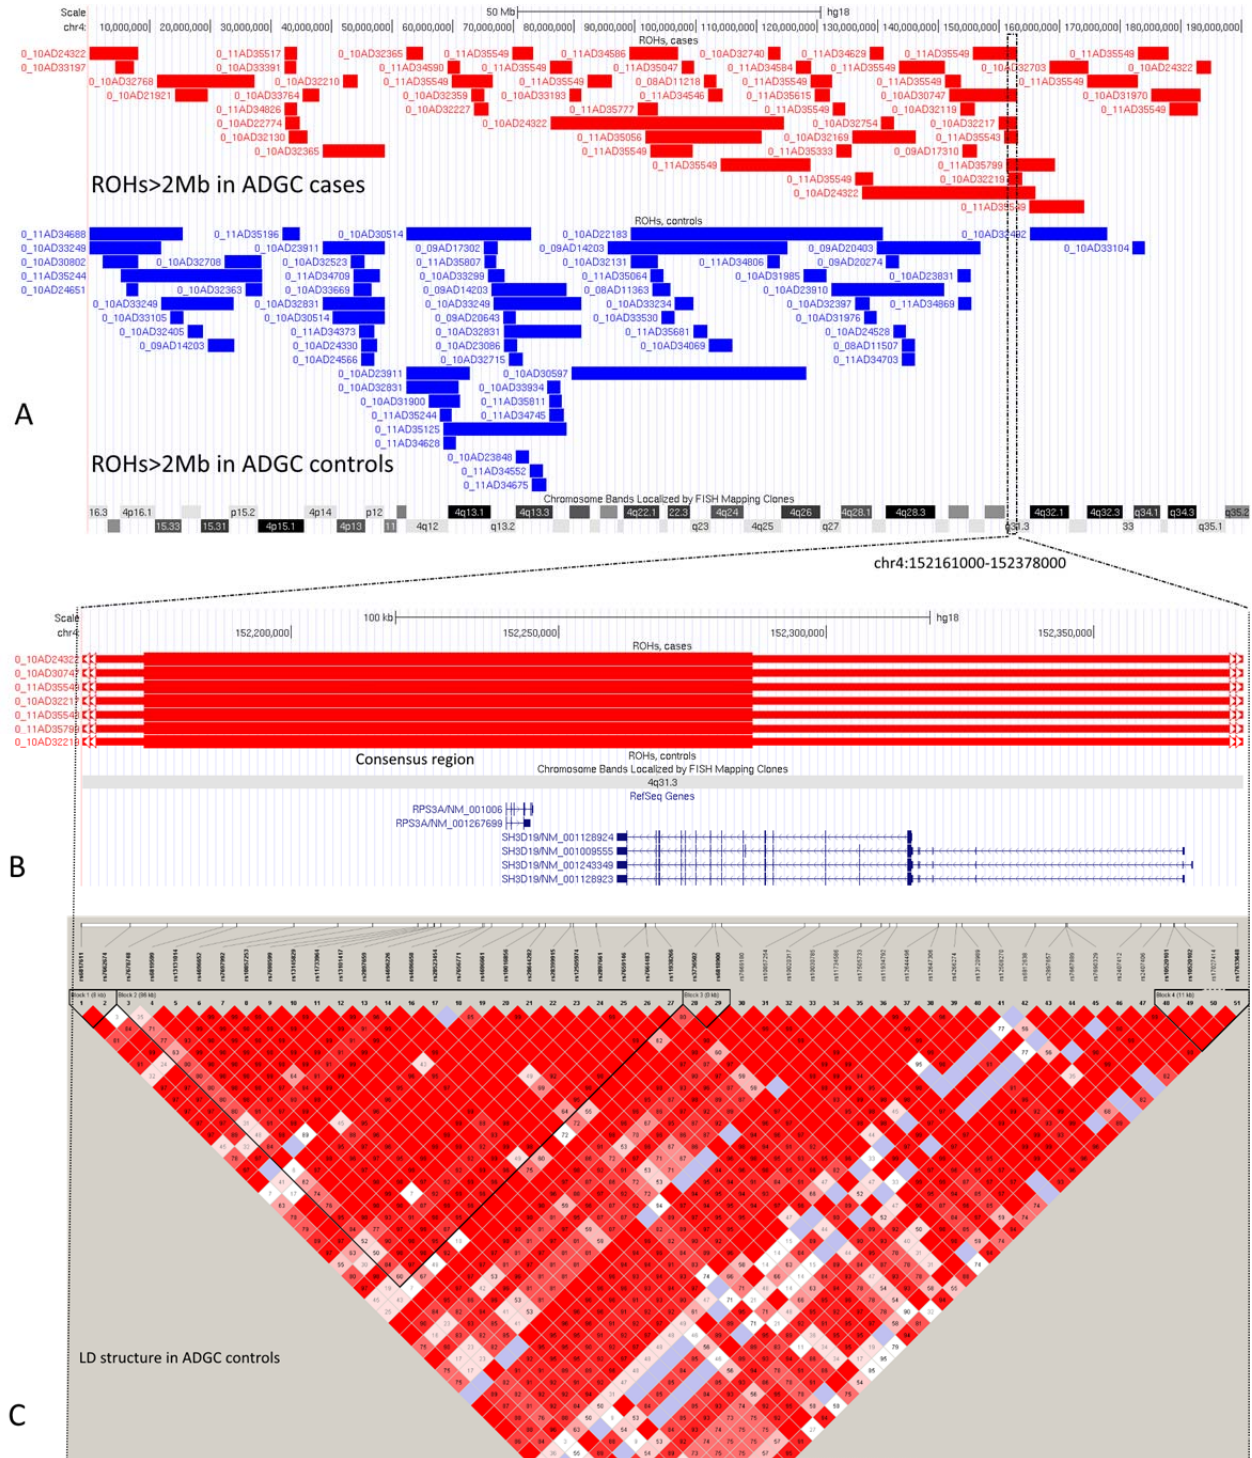

**A.** ROHs > 2Mb mapped to chromosome 4 among cases (n=871) and controls (n=1620) **B.** Significant consensus region at chr4q31.3 (dashed bar), which was overlapped by ROHs > 2Mb in 7 cases (thick red bars). **C.** LD structure of the Chr4:152161000-152378000/hg18 region among controls indicates that this consensus region belongs to a single LD block.

**eFigure 3. Consensus Region on chr15q24.1.3 Associated With AD in the CHAP-Indianapolis Data Set**

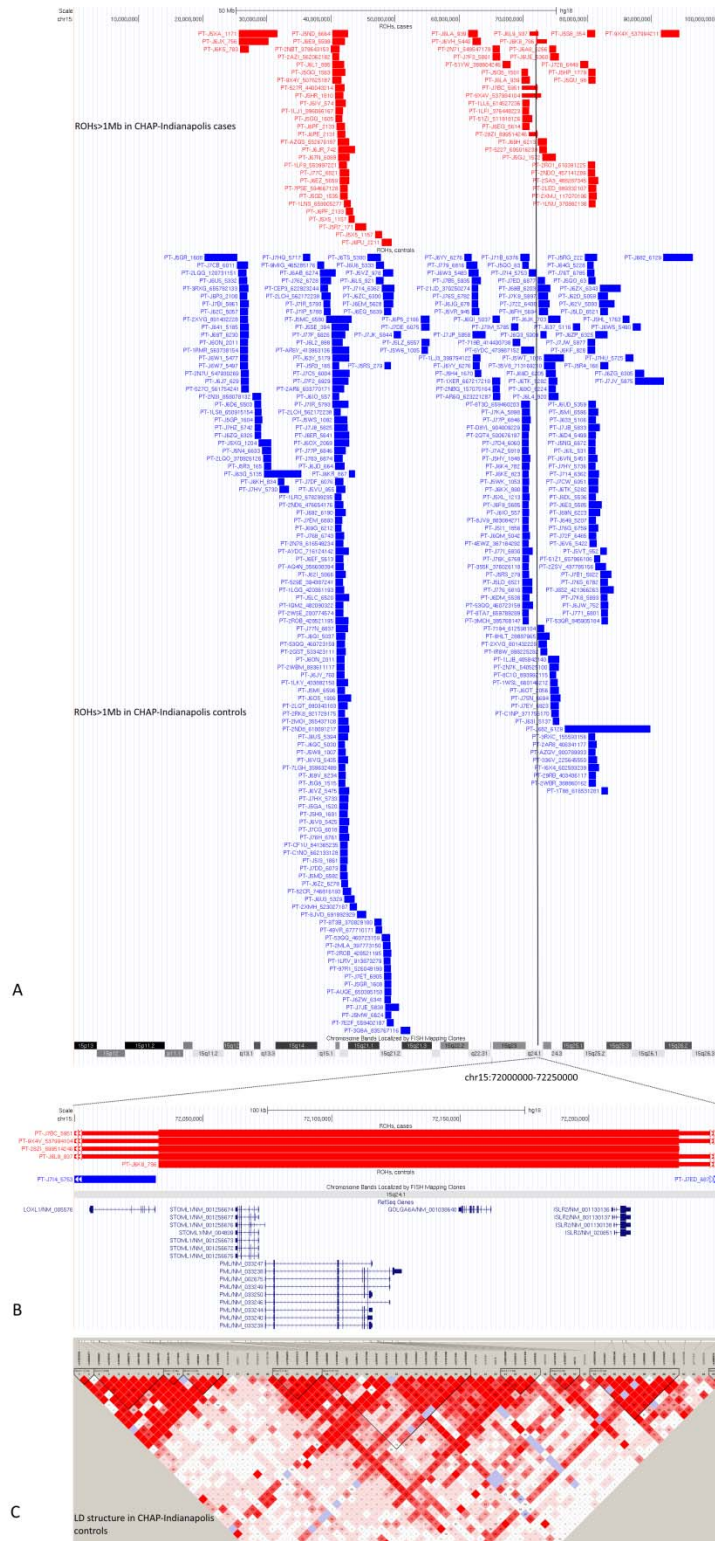

**A.** ROHs>1Mb on chromosome 15 among cases (n=279) and controls (n=1367). **B.** Significant consensus region on chr15q24.1 (vertical line), which was overlapped by ROHs>2Mb in 5 cases (thick red bars). **C.** LD structure of the Chr15:72000000-72250000/hg18 region among controls.

© 2015 American Medical Association. All rights reserved.

**eFigure 4.** Histone Modifications Map of Chromosome 3 From the Roadmap Epigenomics Project (<http://www.roadmapepigenomics.org/>)

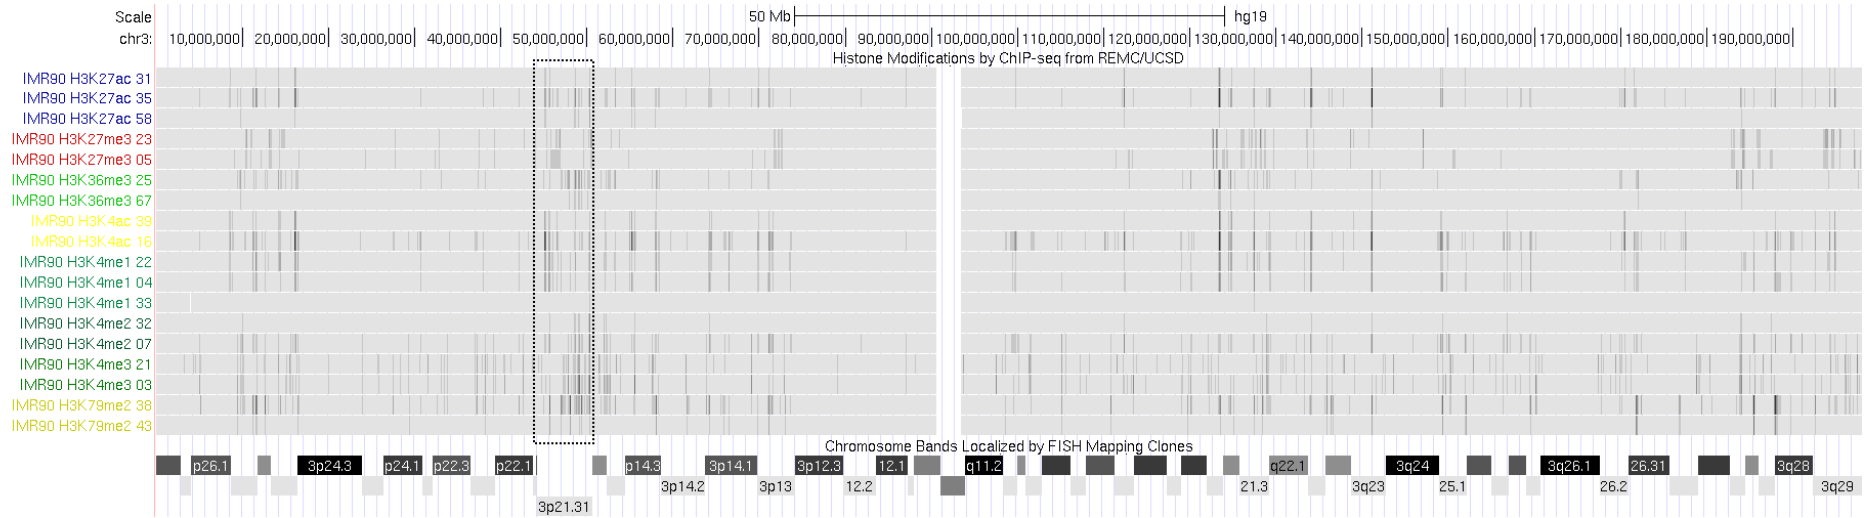

ChIP sequencing for the human cell line IMR90 revealed a dense accumulation of gene regulatory elements at Chr3p21.31 (dashed rectangle).

**eTable 1.** A 114-kb Consensus Region Flanked by SNPs rs6817611 and rs7669180 (chr4:152172448-152286356/hg18) Was Overlapped by ROHs>2Mb in 7 Cases and No Controls From the ADGC Data Set (EMP1=0.0008; EMP2=0.0438).

| SNP        | position  | 10AD24322 | 11AD35543 | 11AD35549 | 10AD32217 | 11AD35799 | 10AD30747 | 10AD32219 |
|------------|-----------|-----------|-----------|-----------|-----------|-----------|-----------|-----------|
| rs6817611  | 152172448 | CC        |
| rs7662674  | 152181140 | CC        | TT        | TT        | CC        | TT        | TT        | TT        |
| rs7678748  | 152187745 | AA        | AA        | CC        | CC        | AA        | AA        | AA        |
| rs6819599  | 152197581 | TT        | CC        | CC        | TT        | TT        | TT        | TT        |
| rs13131014 | 152200086 | CC        | CC        | TT        | CC        | CC        | CC        | CC        |
| rs4696652  | 152210222 | AA        | AA        | AA        | AA        | CC        | CC        | CC        |
| rs7697992  | 152218072 | TT        | GG        | GG        | GG        | TT        | TT        | TT        |
| rs10857253 | 152224234 | TT        | TT        | TT        | TT        | CC        | CC        | CC        |
| rs7698599  | 152232260 | TT        | TT        | TT        | TT        | GG        | GG        | GG        |
| rs13145829 | 152234103 | GG        | GG        | GG        | GG        | AA        | AA        | AA        |
| rs11733964 | 152235154 | TT        | TT        | TT        | TT        | CC        | CC        | CC        |
| rs13101417 | 152235226 | CC        | CC        | CC        | CC        | TT        | TT        | TT        |
| rs2897659  | 152236381 | GG        | GG        | GG        | GG        | AA        | AA        | AA        |
| rs4696226  | 152239679 | CC        | TT        | TT        | TT        | CC        | CC        | CC        |
| rs2280283  | 152240227 | AA        | GG        | GG        | GG        | GG        | GG        | GG        |
| rs4696658  | 152243776 | TT        | TT        | TT        | TT        | GG        | GG        | GG        |
| rs28523454 | 152244087 | AA        |
| rs7656771  | 152245419 | CC        | TT        | TT        | TT        | TT        | TT        | TT        |
| rs4696661  | 152250888 | TT        | CC        | CC        | CC        | TT        | TT        | TT        |
| rs10016856 | 152253885 | AA        |
| rs28644282 | 152254976 | TT        |
| rs28399915 | 152259414 | GG        |
| rs12505974 | 152259936 | CC        | CC        | CC        | CC        | TT        | TT        | TT        |
| rs2897661  | 152263998 | TT        |
| rs7659146  | 152272752 | GG        | AA        | AA        | AA        | GG        | GG        | GG        |
| rs7664483  | 152272858 | GG        | GG        | GG        | GG        | AA        | AA        | AA        |
| rs11938266 | 152274523 | TT        | CC        | CC        | CC        | TT        | TT        | TT        |
| rs3736502  | 152284647 | TT        | CC        | CC        | CC        | CC        | CC        | CC        |
| rs6818900  | 152285134 | AA        | AA        | AA        | AA        | GG        | AA        | GA        |
| rs7669180  | 152286356 | AA        | AA        | AA        | AA        | CC        | CC        | CC        |

**eTable 2.** A 202-kb Consensus Region Flanked by SNPs rs12442211 and rs11635599 (chr15: 72032728-72235049/hg18) Was Overlapped by >1Mb-ROHs in 5 Cases and No Controls (EMP1=0.0002; EMP2=0.023) From the CHAP-Indianapolis Data Set. A shared haplotype was observed in 4 cases at the site of consensus region (red font).

| SNP        | Position | PT-9X4V_537994104 | PT-28ZI_899514246 | PT-J6L9_937 | PT-J6K8_796 | PT-J7BC_5951 |
|------------|----------|-------------------|-------------------|-------------|-------------|--------------|
| rs12442211 | 72032728 | GG                | GG                | GG          | GG          | AA           |
| rs12101466 | 72035441 | AA                | AA                | AA          | AA          | GG           |
| rs12102019 | 72035530 | TT                | TT                | TT          | TT          | CC           |
| rs11854876 | 72038358 | TT                | TT                | TT          | TT          | TT           |
| rs10152173 | 72039461 | TT                | TT                | TT          | TT          | CC           |
| rs10152898 | 72042174 | GG                | GG                | GG          | GG          | TT           |
| rs11072458 | 72043460 | AA                | AA                | AA          | AA          | GG           |
| rs4886809  | 72045502 | CC                | CC                | CC          | CC          | CC           |
| rs11636934 | 72062223 | AA                | AA                | AA          | AA          | GG           |
| rs2507     | 72062729 | AA                | AA                | AA          | AA          | GG           |
| rs2289413  | 72063281 | AA                | AA                | AA          | AA          | AA           |
| rs11072460 | 72067920 | TT                | TT                | TT          | TT          | GG           |
| rs3816197  | 72069933 | CC                | CC                | CC          | CC          | CC           |
| rs5742914  | 72073982 | CC                | CC                | CC          | CC          | CC           |
| rs3784563  | 72078046 | CC                | CC                | CC          | CC          | CC           |
| rs3784562  | 72078076 | CC                | CC                | CC          | CC          | TT           |
| rs10162627 | 72086923 | AA                | AA                | AA          | AA          | AA           |
| rs11072463 | 72090402 | CC                | CC                | CC          | CC          | CC           |
| rs11072464 | 72092235 | AA                | AA                | AA          | AA          | AA           |
| rs11072468 | 72099847 | TT                | TT                | TT          | TT          | TT           |
| rs2277599  | 72104096 | AA                | AA                | AA          | AA          | AA           |
| rs11855663 | 72112796 | GG                | GG                | GG          | GG          | GG           |
| rs743580   | 72115169 | AA                | AA                | AA          | AA          | AA           |
| rs743581   | 72115194 | GG                | GG                | GG          | GG          | GG           |
| rs9479     | 72115629 | AA                | AA                | AA          | AA          | AA           |
| rs10851869 | 72118136 | TT                | TT                | TT          | TT          | TT           |
| rs1550434  | 72118264 | CC                | CC                | CC          | CC          | CC           |
| rs12917449 | 72118712 | AA                | AA                | AA          | AA          | AA           |
| rs3784556  | 72119241 | GG                | GG                | GG          | GG          | GG           |
| rs876383   | 72120466 | GG                | GG                | GG          | GG          | GG           |
| rs5742915  | 72123686 | TT                | TT                | TT          | TT          | TT           |
| rs1036673  | 72125515 | CC                | CC                | CC          | CC          | CC           |
| rs6772     | 72125992 | CC                | CC                | CC          | CC          | CC           |
| rs723434   | 72130383 | TT                | TT                | TT          | TT          | TT           |
| rs28503548 | 72200687 | GG                | GG                | GG          | GG          | AA           |
| rs4454921  | 72206862 | AA                | AA                | AA          | AA          | AA           |
| rs12904268 | 72207279 | TT                | TT                | TT          | TT          | TT           |
| rs3910071  | 72211204 | TT                | TT                | TT          | TT          | TT           |
| rs3743207  | 72212463 | TT                | TT                | TT          | TT          | TT           |
| rs3889598  | 72212558 | CC                | CC                | CC          | CC          | CC           |
| rs16969056 | 72219707 | GG                | GG                | GG          | GG          | AA           |
| rs12164922 | 72224840 | GG                | GG                | GG          | GG          | GG           |
| rs8033129  | 72227472 | AA                | 00                | AA          | AA          | CC           |
| rs11635599 | 72235049 | TT                | TT                | TT          | TT          | TT           |



**eTable 3.** Gene-Based Analyses of the Entire Data Set Revealed Several Genes on Chr3p21.31 That Were Intersected by ROHs>3Mb Significantly More Frequently in Cases Compared With Controls

| Gene     | Reference Sequence | EMP1   | EMP2   | Cases | Controls | %cases | %controls | strand | txStart/hg18 | txEnd/hg18 | cdsStart/hg18 | cdsEnd/hg18 | exonCount |
|----------|--------------------|--------|--------|-------|----------|--------|-----------|--------|--------------|------------|---------------|-------------|-----------|
| CSPG5    | NM_001206942       | 0.0001 | 0.0392 | 31    | 23       | 1.62%  | 0.60%     | -      | 47578731     | 47596734   | 47579093      | 47594105    | 5         |
| PFKFB4   | NM_004567          | 0.0001 | 0.0064 | 45    | 37       | 2.35%  | 0.96%     | -      | 48530120     | 48569231   | 48532183      | 48569214    | 14        |
| UCN2     | NM_033199          | 0.0002 | 0.0131 | 46    | 40       | 2.40%  | 1.04%     | -      | 48574154     | 48576205   | 48575222      | 48575561    | 2         |
| COL7A1   | NM_000094          | 0.0002 | 0.0131 | 46    | 40       | 2.40%  | 1.04%     | -      | 48576509     | 48607597   | 48576842      | 48607596    | 118       |
| UQCRC1   | NM_003365          | 0.0002 | 0.0131 | 46    | 40       | 2.40%  | 1.04%     | -      | 48611435     | 48622102   | 48611564      | 48622057    | 13        |
| TMEM89   | NM_001008269       | 0.0003 | 0.0296 | 46    | 41       | 2.40%  | 1.06%     | -      | 48633278     | 48634193   | 48633278      | 48634193    | 2         |
| SLC26A6  | NM_001040454       | 0.0003 | 0.0320 | 46    | 42       | 2.40%  | 1.09%     | -      | 48638159     | 48646283   | 48638422      | 48646032    | 20        |
| CAMKV    | NM_024046          | 0.0001 | 0.0391 | 48    | 45       | 2.50%  | 1.17%     | -      | 49870425     | 49882373   | 49871754      | 49874825    | 11        |
| MST1R    | NM_002447          | 0.0001 | 0.0391 | 48    | 45       | 2.50%  | 1.17%     | -      | 49899439     | 49916310   | 49899743      | 49916046    | 20        |
| MON1A    | NM_032355          | 0.0001 | 0.0391 | 48    | 45       | 2.50%  | 1.17%     | -      | 49921305     | 49942449   | 49921450      | 49942323    | 6         |
| RBM6     | NM_001167582       | 0.0001 | 0.0391 | 48    | 45       | 2.50%  | 1.17%     | +      | 49952480     | 50089689   | 50060690      | 50089570    | 17        |
| RBM5     | NM_005778          | 0.0001 | 0.0301 | 46    | 42       | 2.40%  | 1.09%     | +      | 50101344     | 50131401   | 50102871      | 50130893    | 25        |
| SEMA3F   | NM_004186          | 0.0002 | 0.0420 | 47    | 44       | 2.45%  | 1.14%     | +      | 50167851     | 50201512   | 50172059      | 50200552    | 19        |
| SLC38A3  | NM_006841          | 0.0001 | 0.0320 | 46    | 42       | 2.40%  | 1.09%     | +      | 50217682     | 50233415   | 50226636      | 50232613    | 16        |
| GNAI2    | NM_001166425       | 0.0001 | 0.0320 | 46    | 42       | 2.40%  | 1.09%     | +      | 50259329     | 50271790   | 50259504      | 50270126    | 9         |
| SEMA3B   | NM_001290060       | 0.0001 | 0.0320 | 46    | 42       | 2.40%  | 1.09%     | +      | 50281430     | 50289606   | 50281676      | 50289141    | 17        |
| LSMEM2   | NM_153215          | 0.0001 | 0.0320 | 46    | 42       | 2.40%  | 1.09%     | +      | 50291461     | 50300549   | 50291548      | 50299637    | 4         |
| IFRD2    | NM_006764          | 0.0001 | 0.0320 | 46    | 42       | 2.40%  | 1.09%     | -      | 50300166     | 50305030   | 50300625      | 50304901    | 12        |
| HYAL3    | NM_001200029       | 0.0001 | 0.0320 | 46    | 42       | 2.40%  | 1.09%     | -      | 50305262     | 50311297   | 50305680      | 50308037    | 4         |
| NAT6     | NM_001200018       | 0.0001 | 0.0320 | 46    | 42       | 2.40%  | 1.09%     | -      | 50308836     | 50311324   | 50309037      | 50309898    | 2         |
| HYAL1    | NM_153281          | 0.0001 | 0.0320 | 46    | 42       | 2.40%  | 1.09%     | -      | 50312323     | 50324816   | 50312917      | 50315391    | 6         |
| TUSC2    | NM_007275          | 0.0001 | 0.0320 | 46    | 42       | 2.40%  | 1.09%     | -      | 50337343     | 50340673   | 50338555      | 50340534    | 3         |
| RASSF1   | NM_170712          | 0.0001 | 0.0320 | 46    | 42       | 2.40%  | 1.09%     | -      | 50342220     | 50350668   | 50343015      | 50344493    | 6         |
| ZMYND10  | NM_015896          | 0.0001 | 0.0320 | 46    | 42       | 2.40%  | 1.09%     | -      | 50353540     | 50358160   | 50353844      | 50358014    | 12        |
| NPRL2    | NM_006545          | 0.0001 | 0.0320 | 46    | 42       | 2.40%  | 1.09%     | -      | 50359922     | 50363490   | 50360040      | 50363087    | 11        |
| CYB561D2 | NM_007022          | 0.0001 | 0.0320 | 46    | 42       | 2.40%  | 1.09%     | +      | 50363129     | 50366500   | 50363868      | 50366179    | 4         |
| TMEM115  | NM_007024          | 0.0001 | 0.0320 | 46    | 42       | 2.40%  | 1.09%     | -      | 50367183     | 50371943   | 50367777      | 50371498    | 2         |
| CACNA2D2 | NM_001291101       | 0.0001 | 0.0320 | 46    | 42       | 2.40%  | 1.09%     | -      | 50375047     | 50516679   | 50377100      | 50488633    | 38        |
| C3orf18  | NM_001171741       | 0.0002 | 0.0392 | 45    | 41       | 2.35%  | 1.06%     | -      | 50570459     | 50583462   | 50572091      | 50578134    | 5         |
| HEMK1    | NM_016173          | 0.0001 | 0.0301 | 45    | 40       | 2.35%  | 1.04%     | +      | 50581912     | 50597425   | 50583539      | 50592852    | 11        |
| CISH     | NM_013324          | 0.0001 | 0.0279 | 45    | 39       | 2.35%  | 1.01%     | -      | 50618888     | 50624266   | 50620041      | 50622878    | 4         |
| MAPKAPK3 | NM_001243926       | 0.0001 | 0.0279 | 45    | 39       | 2.35%  | 1.01%     | +      | 50624296     | 50661732   | 50630000      | 50660481    | 13        |
| DOCK3    | NM_004947          | 0.0001 | 0.0279 | 45    | 39       | 2.35%  | 1.01%     | +      | 50687675     | 51396669   | 50687698      | 51394030    | 53        |



**eTable 4.** Nominally Significant Results Obtained in the Entire African American Data Set (AA) Compared With the Nominally Significant Results for the Caribbean Hispanic Data Set (HISP) (547 AD Cases and 542 Controls) Reported in Ghani et al, *JAMA Neurology* 2013

| Chr | Gene   | RefSeq       | Band       | Dataset | EMP1  | EMP2  |
|-----|--------|--------------|------------|---------|-------|-------|
| 3   | NKTR   | NM_005385    | Chr3p22.1  | AA      | 0.003 | 0.997 |
|     |        |              |            | HISP    | 0.038 | 1.000 |
| 3   | SEC22C | NM_001201572 | Chr3p22.1  | AA      | 0.003 | 0.997 |
|     |        |              |            | HISP    | 0.038 | 1.000 |
| 3   | SS18L2 | NM_016305    | Chr3p22.1  | AA      | 0.003 | 0.997 |
|     |        |              |            | HISP    | 0.038 | 1.000 |
| 3   | ZBTB47 | NM_145166    | Chr3p22.1  | AA      | 0.001 | 0.789 |
|     |        |              |            | HISP    | 0.038 | 1.000 |
| 3   | SCN5A  | NM_001099405 | Chr3p22.2  | AA      | 0.018 | 1.000 |
|     |        |              |            | HISP    | 0.030 | 1.000 |
| 3   | RBMS3  | NM_001177711 | Chr3p24.1  | AA      | 0.045 | 1.000 |
|     |        |              |            | HISP    | 0.008 | 0.997 |
| 9   | PAX5   | NM_001280548 | Chr9p13.2  | AA      | 0.037 | 1.000 |
|     |        |              |            | HISP    | 0.007 | 0.997 |
| 9   | ZCCHC7 | NM_001289120 | Chr9p13.2  | AA      | 0.044 | 1.000 |
|     |        |              |            | HISP    | 0.007 | 0.997 |
| 9   | NFX1   | NM_002504    | Chr9p13.3  | AA      | 0.049 | 1.000 |
|     |        |              |            | HISP    | 0.035 | 1.000 |
| 9   | AQP7   | NM_001170    | Chr9p13.3  | AA      | 0.049 | 1.000 |
|     |        |              |            | HISP    | 0.035 | 1.000 |
| 19  | INSR   | NM_000208    | Chr19p13.2 | AA      | 0.037 | 1.000 |
|     |        |              |            | HISP    | 0.032 | 1.000 |
| 19  | ZNF557 | NM_024341    | Chr19p13.2 | AA      | 0.037 | 1.000 |
|     |        |              |            | HISP    | 0.016 | 1.000 |

**eTable 5.** List of Nominally Significant Genes Intersected by ROHs in the ADGC and CHAP-Indianapolis (C-I) Data Sets

| Gene    | EMP1   | EMP2   | dataset | ROHs> | Cytoband | Transcript   | txStart/hg18 | txEnd/hg18 | cdsStart/hg18 | cdsEnd/hg18 | exonCount |
|---------|--------|--------|---------|-------|----------|--------------|--------------|------------|---------------|-------------|-----------|
| POMGNT2 | 0.0433 | 1.0000 | ADGC    | 1Mb   | 3p22.1   | NM_032806    | 43095724     | 43122579   | 43096184      | 43097927    | 2         |
| POMGNT2 | 0.0291 | 1.0000 | C-I     | 1Mb   | 3p22.1   | NM_032806    | 43095724     | 43122579   | 43096184      | 43097927    | 2         |
| CDC25A  | 0.0359 | 0.9962 | ADGC    | 3Mb   | 3p21.31  | NM_001789    | 48173671     | 48204805   | 48175438      | 48204441    | 15        |
| CDC25A  | 0.0052 | 0.2407 | C-I     | 3Mb   | 3p21.31  | NM_001789    | 48173671     | 48204805   | 48175438      | 48204441    | 15        |
| CDC25A  | 0.0220 | 0.9990 | C-I     | 2Mb   | 3p21.31  | NM_001789    | 48173671     | 48204805   | 48175438      | 48204441    | 15        |
| MIR4443 | 0.0359 | 0.9962 | ADGC    | 3Mb   | 3p21.31  | NR_039645    | 48213057     | 48213110   | 48213110      | 48213110    | 1         |
| MIR4443 | 0.0052 | 0.2407 | C-I     | 3Mb   | 3p21.31  | NR_039645    | 48213057     | 48213110   | 48213110      | 48213110    | 1         |
| MIR4443 | 0.0220 | 0.9990 | C-I     | 2Mb   | 3p21.31  | NR_039645    | 48213057     | 48213110   | 48213110      | 48213110    | 1         |
| CAMP    | 0.0359 | 0.9962 | ADGC    | 3Mb   | 3p21.31  | NM_004345    | 48239840     | 48241985   | 48239996      | 48241918    | 4         |
| CAMP    | 0.0052 | 0.2407 | C-I     | 3Mb   | 3p21.31  | NM_004345    | 48239840     | 48241985   | 48239996      | 48241918    | 4         |
| CAMP    | 0.0220 | 0.9990 | C-I     | 2Mb   | 3p21.31  | NM_004345    | 48239840     | 48241985   | 48239996      | 48241918    | 4         |
| ZNF589  | 0.0234 | 0.9896 | ADGC    | 3Mb   | 3p21.31  | NM_016089    | 48257599     | 48287483   | 48257665      | 48285280    | 4         |
| ZNF589  | 0.0052 | 0.2407 | C-I     | 3Mb   | 3p21.31  | NM_016089    | 48257599     | 48287483   | 48257665      | 48285280    | 4         |
| ZNF589  | 0.0220 | 0.9990 | C-I     | 2Mb   | 3p21.31  | NM_016089    | 48257599     | 48287483   | 48257665      | 48285280    | 4         |
| NME6    | 0.0234 | 0.9896 | ADGC    | 3Mb   | 3p21.31  | NM_005793    | 48310592     | 48317852   | 48311130      | 48317806    | 6         |
| NME6    | 0.0052 | 0.2407 | C-I     | 3Mb   | 3p21.31  | NM_005793    | 48310592     | 48317852   | 48311130      | 48317806    | 6         |
| NME6    | 0.0220 | 0.9990 | C-I     | 2Mb   | 3p21.31  | NM_005793    | 48310592     | 48317852   | 48311130      | 48317806    | 6         |
| SPINK8  | 0.0234 | 0.9896 | ADGC    | 3Mb   | 3p21.31  | NM_001080525 | 48323339     | 48344835   | 48323485      | 48344835    | 5         |
| SPINK8  | 0.0052 | 0.2407 | C-I     | 3Mb   | 3p21.31  | NM_001080525 | 48323339     | 48344835   | 48323485      | 48344835    | 5         |
| SPINK8  | 0.0220 | 0.9990 | C-I     | 2Mb   | 3p21.31  | NM_001080525 | 48323339     | 48344835   | 48323485      | 48344835    | 5         |
| FBXW12  | 0.0234 | 0.9896 | ADGC    | 3Mb   | 3p21.31  | NM_001159929 | 48388712     | 48411194   | 48388781      | 48411128    | 10        |
| FBXW12  | 0.0015 | 0.1976 | C-I     | 3Mb   | 3p21.31  | NM_001159929 | 48388712     | 48411194   | 48388781      | 48411128    | 10        |
| FBXW12  | 0.0076 | 0.9971 | C-I     | 2Mb   | 3p21.31  | NM_001159929 | 48388712     | 48411194   | 48388781      | 48411128    | 10        |
| FBXW12  | 0.0266 | 1.0000 | C-I     | 1Mb   | 3p21.31  | NM_001159929 | 48388712     | 48411194   | 48388781      | 48411128    | 10        |
| PLXNB1  | 0.0309 | 0.9947 | ADGC    | 3Mb   | 3p21.31  | NM_001130082 | 48420264     | 48446464   | 48420896      | 48441024    | 38        |
| PLXNB1  | 0.0309 | 0.9947 | ADGC    | 3Mb   | 3p21.31  | NM_001130082 | 48420264     | 48446464   | 48420896      | 48441024    | 38        |
| PLXNB1  | 0.0309 | 0.9947 | ADGC    | 3Mb   | 3p21.31  | NM_002673    | 48420264     | 48445876   | 48420896      | 48441024    | 38        |
| PLXNB1  | 0.0309 | 0.9947 | ADGC    | 3Mb   | 3p21.31  | NM_002673    | 48420264     | 48445876   | 48420896      | 48441024    | 38        |
| PLXNB1  | 0.0015 | 0.1976 | C-I     | 3Mb   | 3p21.31  | NM_001130082 | 48420264     | 48446464   | 48420896      | 48441024    | 38        |
| PLXNB1  | 0.0015 | 0.1976 | C-I     | 3Mb   | 3p21.31  | NM_001130082 | 48420264     | 48446464   | 48420896      | 48441024    | 38        |
| PLXNB1  | 0.0015 | 0.1976 | C-I     | 3Mb   | 3p21.31  | NM_002673    | 48420264     | 48445876   | 48420896      | 48441024    | 38        |
| PLXNB1  | 0.0015 | 0.1976 | C-I     | 3Mb   | 3p21.31  | NM_002673    | 48420264     | 48445876   | 48420896      | 48441024    | 38        |
| PLXNB1  | 0.0076 | 0.9971 | C-I     | 2Mb   | 3p21.31  | NM_001130082 | 48420264     | 48446464   | 48420896      | 48441024    | 38        |
| PLXNB1  | 0.0076 | 0.9971 | C-I     | 2Mb   | 3p21.31  | NM_001130082 | 48420264     | 48446464   | 48420896      | 48441024    | 38        |
| PLXNB1  | 0.0076 | 0.9971 | C-I     | 2Mb   | 3p21.31  | NM_002673    | 48420264     | 48445876   | 48420896      | 48441024    | 38        |
| PLXNB1  | 0.0076 | 0.9971 | C-I     | 2Mb   | 3p21.31  | NM_002673    | 48420264     | 48445876   | 48420896      | 48441024    | 38        |
| PLXNB1  | 0.0076 | 0.9971 | C-I     | 2Mb   | 3p21.31  | NM_002673    | 48420264     | 48445876   | 48420896      | 48441024    | 38        |
| PLXNB1  | 0.0266 | 1.0000 | C-I     | 1Mb   | 3p21.31  | NM_001130082 | 48420264     | 48446464   | 48420896      | 48441024    | 38        |
| PLXNB1  | 0.0266 | 1.0000 | C-I     | 1Mb   | 3p21.31  | NM_001130082 | 48420264     | 48446464   | 48420896      | 48441024    | 38        |
| PLXNB1  | 0.0266 | 1.0000 | C-I     | 1Mb   | 3p21.31  | NM_002673    | 48420264     | 48445876   | 48420896      | 48441024    | 38        |
| PLXNB1  | 0.0266 | 1.0000 | C-I     | 1Mb   | 3p21.31  | NM_002673    | 48420264     | 48445876   | 48420896      | 48441024    | 38        |
| CCDC51  | 0.0309 | 0.9947 | ADGC    | 3Mb   | 3p21.31  | NM_001256966 | 48448583     | 48456533   | 48448821      | 48450270    | 4         |
| CCDC51  | 0.0015 | 0.1976 | C-I     | 3Mb   | 3p21.31  | NM_001256966 | 48448583     | 48456533   | 48448821      | 48450270    | 4         |
| CCDC51  | 0.0076 | 0.9971 | C-I     | 2Mb   | 3p21.31  | NM_001256966 | 48448583     | 48456533   | 48448821      | 48450270    | 4         |
| CCDC51  | 0.0266 | 1.0000 | C-I     | 1Mb   | 3p21.31  | NM_001256966 | 48448583     | 48456533   | 48448821      | 48450270    | 4         |
| TMA7    | 0.0309 | 0.9947 | ADGC    | 3Mb   | 3p21.31  | NM_015933    | 48456689     | 48460541   | 48456710      | 48460294    | 4         |
| TMA7    | 0.0015 | 0.1976 | C-I     | 3Mb   | 3p21.31  | NM_015933    | 48456689     | 48460541   | 48456710      | 48460294    | 4         |
| TMA7    | 0.0076 | 0.9971 | C-I     | 2Mb   | 3p21.31  | NM_015933    | 48456689     | 48460541   | 48456710      | 48460294    | 4         |
| TMA7    | 0.0266 | 1.0000 | C-I     | 1Mb   | 3p21.31  | NM_015933    | 48456689     | 48460541   | 48456710      | 48460294    | 4         |
| ATRIP   | 0.0309 | 0.9947 | ADGC    | 3Mb   | 3p21.31  | NM_032166    | 48463117     | 48482058   | 48463253      | 48481957    | 12        |
| ATRIP   | 0.0309 | 0.9947 | ADGC    | 3Mb   | 3p21.31  | NM_032166    | 48463117     | 48482058   | 48463253      | 48481957    | 12        |
| ATRIP   | 0.0468 | 1.0000 | ADGC    | 2Mb   | 3p21.31  | NM_032166    | 48463117     | 48482058   | 48463253      | 48481957    | 12        |
| ATRIP   | 0.0468 | 1.0000 | ADGC    | 2Mb   | 3p21.31  | NM_032166    | 48463117     | 48482058   | 48463253      | 48481957    | 12        |
| ATRIP   | 0.0015 | 0.1976 | C-I     | 3Mb   | 3p21.31  | NM_032166    | 48463117     | 48482058   | 48463253      | 48481957    | 12        |
| ATRIP   | 0.0015 | 0.1976 | C-I     | 3Mb   | 3p21.31  | NM_032166    | 48463117     | 48482058   | 48463253      | 48481957    | 12        |
| ATRIP   | 0.0119 | 0.9977 | C-I     | 2Mb   | 3p21.31  | NM_032166    | 48463117     | 48482058   | 48463253      | 48481957    | 12        |
| ATRIP   | 0.0119 | 0.9977 | C-I     | 2Mb   | 3p21.31  | NM_032166    | 48463117     | 48482058   | 48463253      | 48481957    | 12        |
| ATRIP   | 0.0253 | 1.0000 | C-I     | 1Mb   | 3p21.31  | NM_032166    | 48463117     | 48482058   | 48463253      | 48481957    | 12        |
| ATRIP   | 0.0253 | 1.0000 | C-I     | 1Mb   | 3p21.31  | NM_032166    | 48463117     | 48482058   | 48463253      | 48481957    | 12        |



|            |        |        |      |     |         |              |          |          |          |          |    |
|------------|--------|--------|------|-----|---------|--------------|----------|----------|----------|----------|----|
| SHISA5     | 0.0119 | 0.9977 | C-I  | 2Mb | 3p21.31 | NM_001272066 | 48484200 | 48517263 | 48485509 | 48513713 | 6  |
| SHISA5     | 0.0119 | 0.9977 | C-I  | 2Mb | 3p21.31 | NM_001272066 | 48484200 | 48517263 | 48485509 | 48513713 | 6  |
| SHISA5     | 0.0119 | 0.9977 | C-I  | 2Mb | 3p21.31 | NM_001272066 | 48484200 | 48517263 | 48485509 | 48513713 | 6  |
| SHISA5     | 0.0119 | 0.9977 | C-I  | 2Mb | 3p21.31 | NM_001272066 | 48484200 | 48517263 | 48485509 | 48513713 | 6  |
| SHISA5     | 0.0119 | 0.9977 | C-I  | 2Mb | 3p21.31 | NM_001272067 | 48484200 | 48517251 | 48485509 | 48513713 | 6  |
| SHISA5     | 0.0119 | 0.9977 | C-I  | 2Mb | 3p21.31 | NM_001272067 | 48484200 | 48517251 | 48485509 | 48513713 | 6  |
| SHISA5     | 0.0119 | 0.9977 | C-I  | 2Mb | 3p21.31 | NM_001272067 | 48484200 | 48517251 | 48485509 | 48513713 | 6  |
| SHISA5     | 0.0119 | 0.9977 | C-I  | 2Mb | 3p21.31 | NM_001272067 | 48484200 | 48517251 | 48485509 | 48513713 | 6  |
| SHISA5     | 0.0119 | 0.9977 | C-I  | 2Mb | 3p21.31 | NM_001272067 | 48484200 | 48517251 | 48485509 | 48513713 | 6  |
| SHISA5     | 0.0119 | 0.9977 | C-I  | 2Mb | 3p21.31 | NM_001272068 | 48484200 | 48516487 | 48485509 | 48513713 | 7  |
| SHISA5     | 0.0119 | 0.9977 | C-I  | 2Mb | 3p21.31 | NM_001272068 | 48484200 | 48516487 | 48485509 | 48513713 | 7  |
| SHISA5     | 0.0119 | 0.9977 | C-I  | 2Mb | 3p21.31 | NM_001272068 | 48484200 | 48516487 | 48485509 | 48513713 | 7  |
| SHISA5     | 0.0119 | 0.9977 | C-I  | 2Mb | 3p21.31 | NM_001272068 | 48484200 | 48516487 | 48485509 | 48513713 | 7  |
| SHISA5     | 0.0119 | 0.9977 | C-I  | 2Mb | 3p21.31 | NM_001272068 | 48484200 | 48516487 | 48485509 | 48513713 | 7  |
| SHISA5     | 0.0119 | 0.9977 | C-I  | 2Mb | 3p21.31 | NM_001272083 | 48484200 | 48489746 | 48485740 | 48489427 | 3  |
| SHISA5     | 0.0119 | 0.9977 | C-I  | 2Mb | 3p21.31 | NM_001272083 | 48484200 | 48489746 | 48485740 | 48489427 | 3  |
| SHISA5     | 0.0119 | 0.9977 | C-I  | 2Mb | 3p21.31 | NM_001272083 | 48484200 | 48489746 | 48485740 | 48489427 | 3  |
| SHISA5     | 0.0119 | 0.9977 | C-I  | 2Mb | 3p21.31 | NM_001272083 | 48484200 | 48489746 | 48485740 | 48489427 | 3  |
| SHISA5     | 0.0119 | 0.9977 | C-I  | 2Mb | 3p21.31 | NM_016479    | 48484200 | 48516686 | 48485509 | 48516531 | 6  |
| SHISA5     | 0.0119 | 0.9977 | C-I  | 2Mb | 3p21.31 | NM_016479    | 48484200 | 48516686 | 48485509 | 48516531 | 6  |
| SHISA5     | 0.0119 | 0.9977 | C-I  | 2Mb | 3p21.31 | NM_016479    | 48484200 | 48516686 | 48485509 | 48516531 | 6  |
| SHISA5     | 0.0119 | 0.9977 | C-I  | 2Mb | 3p21.31 | NM_016479    | 48484200 | 48516686 | 48485509 | 48516531 | 6  |
| SHISA5     | 0.0119 | 0.9977 | C-I  | 2Mb | 3p21.31 | NM_016479    | 48484200 | 48516686 | 48485509 | 48516531 | 6  |
| SHISA5     | 0.0350 | 1.0000 | C-I  | 1Mb | 3p21.31 | NM_001272066 | 48484200 | 48517263 | 48485509 | 48513713 | 6  |
| SHISA5     | 0.0350 | 1.0000 | C-I  | 1Mb | 3p21.31 | NM_001272066 | 48484200 | 48517263 | 48485509 | 48513713 | 6  |
| SHISA5     | 0.0350 | 1.0000 | C-I  | 1Mb | 3p21.31 | NM_001272066 | 48484200 | 48517263 | 48485509 | 48513713 | 6  |
| SHISA5     | 0.0350 | 1.0000 | C-I  | 1Mb | 3p21.31 | NM_001272066 | 48484200 | 48517263 | 48485509 | 48513713 | 6  |
| SHISA5     | 0.0350 | 1.0000 | C-I  | 1Mb | 3p21.31 | NM_001272067 | 48484200 | 48517251 | 48485509 | 48513713 | 6  |
| SHISA5     | 0.0350 | 1.0000 | C-I  | 1Mb | 3p21.31 | NM_001272067 | 48484200 | 48517251 | 48485509 | 48513713 | 6  |
| SHISA5     | 0.0350 | 1.0000 | C-I  | 1Mb | 3p21.31 | NM_001272067 | 48484200 | 48517251 | 48485509 | 48513713 | 6  |
| SHISA5     | 0.0350 | 1.0000 | C-I  | 1Mb | 3p21.31 | NM_001272068 | 48484200 | 48516487 | 48485509 | 48513713 | 7  |
| SHISA5     | 0.0350 | 1.0000 | C-I  | 1Mb | 3p21.31 | NM_001272068 | 48484200 | 48516487 | 48485509 | 48513713 | 7  |
| SHISA5     | 0.0350 | 1.0000 | C-I  | 1Mb | 3p21.31 | NM_001272068 | 48484200 | 48516487 | 48485509 | 48513713 | 7  |
| SHISA5     | 0.0350 | 1.0000 | C-I  | 1Mb | 3p21.31 | NM_001272068 | 48484200 | 48516487 | 48485509 | 48513713 | 7  |
| SHISA5     | 0.0350 | 1.0000 | C-I  | 1Mb | 3p21.31 | NM_016479    | 48484200 | 48516686 | 48485509 | 48516531 | 6  |
| SHISA5     | 0.0350 | 1.0000 | C-I  | 1Mb | 3p21.31 | NM_016479    | 48484200 | 48516686 | 48485509 | 48516531 | 6  |
| SHISA5     | 0.0350 | 1.0000 | C-I  | 1Mb | 3p21.31 | NM_016479    | 48484200 | 48516686 | 48485509 | 48516531 | 6  |
| SHISA5     | 0.0350 | 1.0000 | C-I  | 1Mb | 3p21.31 | NM_016479    | 48484200 | 48516686 | 48485509 | 48516531 | 6  |
| SHISA5     | 0.0359 | 1.0000 | C-I  | 1Mb | 3p21.31 | NM_001272083 | 48484200 | 48489746 | 48485740 | 48489427 | 3  |
| SHISA5     | 0.0359 | 1.0000 | C-I  | 1Mb | 3p21.31 | NM_001272083 | 48484200 | 48489746 | 48485740 | 48489427 | 3  |
| SHISA5     | 0.0359 | 1.0000 | C-I  | 1Mb | 3p21.31 | NM_001272083 | 48484200 | 48489746 | 48485740 | 48489427 | 3  |
| SHISA5     | 0.0359 | 1.0000 | C-I  | 1Mb | 3p21.31 | NM_001272083 | 48484200 | 48489746 | 48485740 | 48489427 | 3  |
| MIR6823    | 0.0441 | 1.0000 | ADGC | 3Mb | 3p21.31 | NR_106881    | 48562397 | 48562458 | 48562458 | 48562458 | 1  |
| MIR6823    | 0.0010 | 0.0329 | C-I  | 3Mb | 3p21.31 | NR_106881    | 48562397 | 48562458 | 48562458 | 48562458 | 1  |
| MIR6823    | 0.0064 | 0.9971 | C-I  | 2Mb | 3p21.31 | NR_106881    | 48562397 | 48562458 | 48562458 | 48562458 | 1  |
| MIR6823    | 0.0410 | 1.0000 | C-I  | 1Mb | 3p21.31 | NR_106881    | 48562397 | 48562458 | 48562458 | 48562458 | 1  |
| MIR711     | 0.0490 | 1.0000 | ADGC | 1Mb | 3p21.31 | NR_031756    | 48591338 | 48591414 | 48591414 | 48591414 | 1  |
| MIR711     | 0.0010 | 0.0329 | C-I  | 3Mb | 3p21.31 | NR_031756    | 48591338 | 48591414 | 48591414 | 48591414 | 1  |
| MIR711     | 0.0064 | 0.9971 | C-I  | 2Mb | 3p21.31 | NR_031756    | 48591338 | 48591414 | 48591414 | 48591414 | 1  |
| CELSR3-AS1 | 0.0341 | 1.0000 | ADGC | 1Mb | 3p21.31 | NR_111921    | 48676204 | 48681607 | 48681607 | 48681607 | 3  |
| CELSR3-AS1 | 0.0014 | 0.1982 | C-I  | 3Mb | 3p21.31 | NR_111921    | 48676204 | 48681607 | 48681607 | 48681607 | 3  |
| CELSR3-AS1 | 0.0103 | 0.9973 | C-I  | 2Mb | 3p21.31 | NR_111921    | 48676204 | 48681607 | 48681607 | 48681607 | 3  |
| NCKIPSD    | 0.0217 | 1.0000 | ADGC | 1Mb | 3p21.31 | NM_016453    | 48686275 | 48698370 | 48686980 | 48698244 | 13 |
| NCKIPSD    | 0.0014 | 0.1982 | C-I  | 3Mb | 3p21.31 | NM_016453    | 48686275 | 48698370 | 48686980 | 48698244 | 13 |
| NCKIPSD    | 0.0103 | 0.9973 | C-I  | 2Mb | 3p21.31 | NM_016453    | 48686275 | 48698370 | 48686980 | 48698244 | 13 |
| IP6K2      | 0.0103 | 1.0000 | ADGC | 1Mb | 3p21.31 | NM_001005909 | 48700439 | 48729715 | 48700709 | 48707728 | 6  |

© 2015 American Medical Association. All rights reserved.

|             |        |        |      |     |         |              |          |          |          |          |    |
|-------------|--------|--------|------|-----|---------|--------------|----------|----------|----------|----------|----|
| IP6K2       | 0.0103 | 1.0000 | ADGC | 1Mb | 3p21.31 | NM_001005909 | 48700439 | 48729715 | 48700709 | 48707728 | 6  |
| IP6K2       | 0.0014 | 0.1982 | C-I  | 3Mb | 3p21.31 | NM_001005909 | 48700439 | 48729715 | 48700709 | 48707728 | 6  |
| IP6K2       | 0.0014 | 0.1982 | C-I  | 3Mb | 3p21.31 | NM_001005909 | 48700439 | 48729715 | 48700709 | 48707728 | 6  |
| IP6K2       | 0.0103 | 0.9973 | C-I  | 2Mb | 3p21.31 | NM_001005909 | 48700439 | 48729715 | 48700709 | 48707728 | 6  |
| IP6K2       | 0.0103 | 0.9973 | C-I  | 2Mb | 3p21.31 | NM_001005909 | 48700439 | 48729715 | 48700709 | 48707728 | 6  |
| IP6K2       | 0.0103 | 1.0000 | ADGC | 1Mb | 3p21.31 | NM_001146179 | 48705886 | 48729715 | 48706900 | 48707728 | 4  |
| IP6K2       | 0.0103 | 1.0000 | ADGC | 1Mb | 3p21.31 | NM_001146179 | 48705886 | 48729715 | 48706900 | 48707728 | 4  |
| IP6K2       | 0.0014 | 0.1982 | C-I  | 3Mb | 3p21.31 | NM_001146179 | 48705886 | 48729715 | 48706900 | 48707728 | 4  |
| IP6K2       | 0.0014 | 0.1982 | C-I  | 3Mb | 3p21.31 | NM_001146179 | 48705886 | 48729715 | 48706900 | 48707728 | 4  |
| IP6K2       | 0.0103 | 0.9973 | C-I  | 2Mb | 3p21.31 | NM_001146179 | 48705886 | 48729715 | 48706900 | 48707728 | 4  |
| IP6K2       | 0.0103 | 0.9973 | C-I  | 2Mb | 3p21.31 | NM_001146179 | 48705886 | 48729715 | 48706900 | 48707728 | 4  |
| PRKAR2A     | 0.0144 | 1.0000 | ADGC | 1Mb | 3p21.31 | NM_004157    | 48763096 | 48860274 | 48764021 | 48860033 | 11 |
| PRKAR2A     | 0.0014 | 0.1982 | C-I  | 3Mb | 3p21.31 | NM_004157    | 48763096 | 48860274 | 48764021 | 48860033 | 11 |
| PRKAR2A     | 0.0120 | 0.9977 | C-I  | 2Mb | 3p21.31 | NM_004157    | 48763096 | 48860274 | 48764021 | 48860033 | 11 |
| PRKAR2A-AS1 | 0.0124 | 1.0000 | ADGC | 1Mb | 3p21.31 | NR_109996    | 48860373 | 48864419 | 48864419 | 48864419 | 2  |
| PRKAR2A-AS1 | 0.0124 | 1.0000 | ADGC | 1Mb | 3p21.31 | NR_109996    | 48860373 | 48864419 | 48864419 | 48864419 | 2  |
| PRKAR2A-AS1 | 0.0014 | 0.1982 | C-I  | 3Mb | 3p21.31 | NR_109996    | 48860373 | 48864419 | 48864419 | 48864419 | 2  |
| PRKAR2A-AS1 | 0.0014 | 0.1982 | C-I  | 3Mb | 3p21.31 | NR_109996    | 48860373 | 48864419 | 48864419 | 48864419 | 2  |
| PRKAR2A-AS1 | 0.0120 | 0.9977 | C-I  | 2Mb | 3p21.31 | NR_109996    | 48860373 | 48864419 | 48864419 | 48864419 | 2  |
| PRKAR2A-AS1 | 0.0120 | 0.9977 | C-I  | 2Mb | 3p21.31 | NR_109996    | 48860373 | 48864419 | 48864419 | 48864419 | 2  |
| SLC25A20    | 0.0124 | 1.0000 | ADGC | 1Mb | 3p21.31 | NM_000387    | 48869359 | 48911430 | 48870146 | 48911231 | 9  |
| SLC25A20    | 0.0014 | 0.1982 | C-I  | 3Mb | 3p21.31 | NM_000387    | 48869359 | 48911430 | 48870146 | 48911231 | 9  |
| SLC25A20    | 0.0120 | 0.9977 | C-I  | 2Mb | 3p21.31 | NM_000387    | 48869359 | 48911430 | 48870146 | 48911231 | 9  |
| ARIH2OS     | 0.0124 | 1.0000 | ADGC | 1Mb | 3p21.31 | NM_001123040 | 48930224 | 48931822 | 48930713 | 48931586 | 1  |
| ARIH2OS     | 0.0014 | 0.1982 | C-I  | 3Mb | 3p21.31 | NM_001123040 | 48930224 | 48931822 | 48930713 | 48931586 | 1  |
| ARIH2OS     | 0.0120 | 0.9977 | C-I  | 2Mb | 3p21.31 | NM_001123040 | 48930224 | 48931822 | 48930713 | 48931586 | 1  |
| ARIH2       | 0.0075 | 1.0000 | ADGC | 1Mb | 3p21.31 | NM_006321    | 48931284 | 48997975 | 48939995 | 48995707 | 16 |
| ARIH2       | 0.0014 | 0.1982 | C-I  | 3Mb | 3p21.31 | NM_006321    | 48931284 | 48997975 | 48939995 | 48995707 | 16 |
| ARIH2       | 0.0295 | 1.0000 | C-I  | 2Mb | 3p21.31 | NM_006321    | 48931284 | 48997975 | 48939995 | 48995707 | 16 |
| P4HTM       | 0.0105 | 1.0000 | ADGC | 1Mb | 3p21.31 | NM_177938    | 49002344 | 49019585 | 49002693 | 49019344 | 9  |
| P4HTM       | 0.0014 | 0.1982 | C-I  | 3Mb | 3p21.31 | NM_177938    | 49002344 | 49019585 | 49002693 | 49019344 | 9  |
| P4HTM       | 0.0226 | 0.9991 | C-I  | 2Mb | 3p21.31 | NM_177938    | 49002344 | 49019585 | 49002693 | 49019344 | 9  |
| WDR6        | 0.0105 | 1.0000 | ADGC | 1Mb | 3p21.31 | NM_018031    | 49019640 | 49028390 | 49019778 | 49027725 | 6  |
| WDR6        | 0.0014 | 0.1982 | C-I  | 3Mb | 3p21.31 | NM_018031    | 49019640 | 49028390 | 49019778 | 49027725 | 6  |
| WDR6        | 0.0226 | 0.9991 | C-I  | 2Mb | 3p21.31 | NM_018031    | 49019640 | 49028390 | 49019778 | 49027725 | 6  |
| DALRD3      | 0.0105 | 1.0000 | ADGC | 1Mb | 3p21.31 | NM_001009996 | 49027925 | 49031045 | 49028024 | 49031001 | 12 |
| DALRD3      | 0.0105 | 1.0000 | ADGC | 1Mb | 3p21.31 | NM_001009996 | 49027925 | 49031045 | 49028024 | 49031001 | 12 |
| DALRD3      | 0.0105 | 1.0000 | ADGC | 1Mb | 3p21.31 | NM_018114    | 49027925 | 49033508 | 49028024 | 49030266 | 12 |
| DALRD3      | 0.0105 | 1.0000 | ADGC | 1Mb | 3p21.31 | NM_018114    | 49027925 | 49033508 | 49028024 | 49030266 | 12 |
| DALRD3      | 0.0014 | 0.1982 | C-I  | 3Mb | 3p21.31 | NM_001009996 | 49027925 | 49031045 | 49028024 | 49031001 | 12 |
| DALRD3      | 0.0014 | 0.1982 | C-I  | 3Mb | 3p21.31 | NM_001009996 | 49027925 | 49031045 | 49028024 | 49031001 | 12 |
| DALRD3      | 0.0014 | 0.1982 | C-I  | 3Mb | 3p21.31 | NM_018114    | 49027925 | 49033508 | 49028024 | 49030266 | 12 |
| DALRD3      | 0.0014 | 0.1982 | C-I  | 3Mb | 3p21.31 | NM_018114    | 49027925 | 49033508 | 49028024 | 49030266 | 12 |
| DALRD3      | 0.0226 | 0.9991 | C-I  | 2Mb | 3p21.31 | NM_001009996 | 49027925 | 49031045 | 49028024 | 49031001 | 12 |
| DALRD3      | 0.0226 | 0.9991 | C-I  | 2Mb | 3p21.31 | NM_001009996 | 49027925 | 49031045 | 49028024 | 49031001 | 12 |
| DALRD3      | 0.0226 | 0.9991 | C-I  | 2Mb | 3p21.31 | NM_018114    | 49027925 | 49033508 | 49028024 | 49030266 | 12 |
| DALRD3      | 0.0226 | 0.9991 | C-I  | 2Mb | 3p21.31 | NM_018114    | 49027925 | 49033508 | 49028024 | 49030266 | 12 |
| MIR425      | 0.0105 | 1.0000 | ADGC | 1Mb | 3p21.31 | NR_029948    | 49032584 | 49032671 | 49032671 | 49032671 | 1  |
| MIR425      | 0.0014 | 0.1982 | C-I  | 3Mb | 3p21.31 | NR_029948    | 49032584 | 49032671 | 49032671 | 49032671 | 1  |
| MIR425      | 0.0226 | 0.9991 | C-I  | 2Mb | 3p21.31 | NR_029948    | 49032584 | 49032671 | 49032671 | 49032671 | 1  |
| NDUFAF3     | 0.0105 | 1.0000 | ADGC | 1Mb | 3p21.31 | NM_199074    | 49032911 | 49035930 | 49034876 | 49035609 | 5  |
| NDUFAF3     | 0.0105 | 1.0000 | ADGC | 1Mb | 3p21.31 | NM_199074    | 49032911 | 49035930 | 49034876 | 49035609 | 5  |
| NDUFAF3     | 0.0105 | 1.0000 | ADGC | 1Mb | 3p21.31 | NM_199074    | 49032911 | 49035930 | 49034876 | 49035609 | 5  |
| NDUFAF3     | 0.0014 | 0.1982 | C-I  | 3Mb | 3p21.31 | NM_199074    | 49032911 | 49035930 | 49034876 | 49035609 | 5  |
| NDUFAF3     | 0.0014 | 0.1982 | C-I  | 3Mb | 3p21.31 | NM_199074    | 49032911 | 49035930 | 49034876 | 49035609 | 5  |
| NDUFAF3     | 0.0014 | 0.1982 | C-I  | 3Mb | 3p21.31 | NM_199074    | 49032911 | 49035930 | 49034876 | 49035609 | 5  |
| NDUFAF3     | 0.0226 | 0.9991 | C-I  | 2Mb | 3p21.31 | NM_199074    | 49032911 | 49035930 | 49034876 | 49035609 | 5  |
| NDUFAF3     | 0.0226 | 0.9991 | C-I  | 2Mb | 3p21.31 | NM_199074    | 49032911 | 49035930 | 49034876 | 49035609 | 5  |
| NDUFAF3     | 0.0226 | 0.9991 | C-I  | 2Mb | 3p21.31 | NM_199074    | 49032911 | 49035930 | 49034876 | 49035609 | 5  |
| MIR191      | 0.0105 | 1.0000 | ADGC | 1Mb | 3p21.31 | NR_029690    | 49033054 | 49033146 | 49033146 | 49033146 | 1  |
| MIR191      | 0.0014 | 0.1982 | C-I  | 3Mb | 3p21.31 | NR_029690    | 49033054 | 49033146 | 49033146 | 49033146 | 1  |
| MIR191      | 0.0226 | 0.9991 | C-I  | 2Mb | 3p21.31 | NR_029690    | 49033054 | 49033146 | 49033146 | 49033146 | 1  |
| NDUFAF3     | 0.0105 | 1.0000 | ADGC | 1Mb | 3p21.31 | NM_199073    | 49033621 | 49035930 | 49034876 | 49035609 | 5  |

|         |        |        |      |     |         |              |          |          |          |          |    |
|---------|--------|--------|------|-----|---------|--------------|----------|----------|----------|----------|----|
| NDUFAF3 | 0.0105 | 1.0000 | ADGC | 1Mb | 3p21.31 | NM_199073    | 49033621 | 49035930 | 49034876 | 49035609 | 5  |
| NDUFAF3 | 0.0105 | 1.0000 | ADGC | 1Mb | 3p21.31 | NM_199073    | 49033621 | 49035930 | 49034876 | 49035609 | 5  |
| NDUFAF3 | 0.0014 | 0.1982 | C-I  | 3Mb | 3p21.31 | NM_199073    | 49033621 | 49035930 | 49034876 | 49035609 | 5  |
| NDUFAF3 | 0.0014 | 0.1982 | C-I  | 3Mb | 3p21.31 | NM_199073    | 49033621 | 49035930 | 49034876 | 49035609 | 5  |
| NDUFAF3 | 0.0014 | 0.1982 | C-I  | 3Mb | 3p21.31 | NM_199073    | 49033621 | 49035930 | 49034876 | 49035609 | 5  |
| NDUFAF3 | 0.0226 | 0.9991 | C-I  | 2Mb | 3p21.31 | NM_199073    | 49033621 | 49035930 | 49034876 | 49035609 | 5  |
| NDUFAF3 | 0.0226 | 0.9991 | C-I  | 2Mb | 3p21.31 | NM_199073    | 49033621 | 49035930 | 49034876 | 49035609 | 5  |
| NDUFAF3 | 0.0226 | 0.9991 | C-I  | 2Mb | 3p21.31 | NM_199073    | 49033621 | 49035930 | 49034876 | 49035609 | 5  |
| NDUFAF3 | 0.0105 | 1.0000 | ADGC | 1Mb | 3p21.31 | NM_199070    | 49034077 | 49035930 | 49034876 | 49035609 | 5  |
| NDUFAF3 | 0.0105 | 1.0000 | ADGC | 1Mb | 3p21.31 | NM_199070    | 49034077 | 49035930 | 49034876 | 49035609 | 5  |
| NDUFAF3 | 0.0105 | 1.0000 | ADGC | 1Mb | 3p21.31 | NM_199070    | 49034077 | 49035930 | 49034876 | 49035609 | 5  |
| NDUFAF3 | 0.0014 | 0.1982 | C-I  | 3Mb | 3p21.31 | NM_199070    | 49034077 | 49035930 | 49034876 | 49035609 | 5  |
| NDUFAF3 | 0.0014 | 0.1982 | C-I  | 3Mb | 3p21.31 | NM_199070    | 49034077 | 49035930 | 49034876 | 49035609 | 5  |
| NDUFAF3 | 0.0014 | 0.1982 | C-I  | 3Mb | 3p21.31 | NM_199070    | 49034077 | 49035930 | 49034876 | 49035609 | 5  |
| NDUFAF3 | 0.0226 | 0.9991 | C-I  | 2Mb | 3p21.31 | NM_199070    | 49034077 | 49035930 | 49034876 | 49035609 | 5  |
| NDUFAF3 | 0.0226 | 0.9991 | C-I  | 2Mb | 3p21.31 | NM_199070    | 49034077 | 49035930 | 49034876 | 49035609 | 5  |
| NDUFAF3 | 0.0226 | 0.9991 | C-I  | 2Mb | 3p21.31 | NM_199070    | 49034077 | 49035930 | 49034876 | 49035609 | 5  |
| IMPDH2  | 0.0105 | 1.0000 | ADGC | 1Mb | 3p21.31 | NM_000884    | 49036765 | 49041879 | 49036819 | 49041787 | 14 |
| IMPDH2  | 0.0014 | 0.1982 | C-I  | 3Mb | 3p21.31 | NM_000884    | 49036765 | 49041879 | 49036819 | 49041787 | 14 |
| IMPDH2  | 0.0226 | 0.9991 | C-I  | 2Mb | 3p21.31 | NM_000884    | 49036765 | 49041879 | 49036819 | 49041787 | 14 |
| QRICH1  | 0.0118 | 1.0000 | ADGC | 1Mb | 3p21.31 | NM_198880    | 49042145 | 49106508 | 49042888 | 49089454 | 10 |
| QRICH1  | 0.0014 | 0.1982 | C-I  | 3Mb | 3p21.31 | NM_198880    | 49042145 | 49106508 | 49042888 | 49089454 | 10 |
| QRICH1  | 0.0226 | 0.9991 | C-I  | 2Mb | 3p21.31 | NM_198880    | 49042145 | 49106508 | 49042888 | 49089454 | 10 |
| QARS    | 0.0092 | 1.0000 | ADGC | 1Mb | 3p21.31 | NM_005051    | 49108368 | 49117566 | 49108465 | 49117170 | 24 |
| QARS    | 0.0014 | 0.1982 | C-I  | 3Mb | 3p21.31 | NM_005051    | 49108368 | 49117566 | 49108465 | 49117170 | 24 |
| QARS    | 0.0226 | 0.9991 | C-I  | 2Mb | 3p21.31 | NM_005051    | 49108368 | 49117566 | 49108465 | 49117170 | 24 |
| MIR6890 | 0.0092 | 1.0000 | ADGC | 1Mb | 3p21.31 | NR_106950    | 49112290 | 49112351 | 49112351 | 49112351 | 1  |
| MIR6890 | 0.0014 | 0.1982 | C-I  | 3Mb | 3p21.31 | NR_106950    | 49112290 | 49112351 | 49112351 | 49112351 | 1  |
| MIR6890 | 0.0226 | 0.9991 | C-I  | 2Mb | 3p21.31 | NR_106950    | 49112290 | 49112351 | 49112351 | 49112351 | 1  |
| USP19   | 0.0092 | 1.0000 | ADGC | 1Mb | 3p21.31 | NM_001199162 | 49120482 | 49133375 | 49120848 | 49131582 | 27 |
| USP19   | 0.0092 | 1.0000 | ADGC | 1Mb | 3p21.31 | NM_001199162 | 49120482 | 49133375 | 49120848 | 49131582 | 27 |
| USP19   | 0.0014 | 0.1982 | C-I  | 3Mb | 3p21.31 | NM_001199162 | 49120482 | 49133375 | 49120848 | 49131582 | 27 |
| USP19   | 0.0014 | 0.1982 | C-I  | 3Mb | 3p21.31 | NM_001199162 | 49120482 | 49133375 | 49120848 | 49131582 | 27 |
| USP19   | 0.0226 | 0.9991 | C-I  | 2Mb | 3p21.31 | NM_001199162 | 49120482 | 49133375 | 49120848 | 49131582 | 27 |
| USP19   | 0.0226 | 0.9991 | C-I  | 2Mb | 3p21.31 | NM_001199162 | 49120482 | 49133375 | 49120848 | 49131582 | 27 |
| USP19   | 0.0092 | 1.0000 | ADGC | 1Mb | 3p21.31 | NM_001199160 | 49121109 | 49133375 | 49121394 | 49131582 | 27 |
| USP19   | 0.0092 | 1.0000 | ADGC | 1Mb | 3p21.31 | NM_001199160 | 49121109 | 49133375 | 49121394 | 49131582 | 27 |
| USP19   | 0.0014 | 0.1982 | C-I  | 3Mb | 3p21.31 | NM_001199160 | 49121109 | 49133375 | 49121394 | 49131582 | 27 |
| USP19   | 0.0014 | 0.1982 | C-I  | 3Mb | 3p21.31 | NM_001199160 | 49121109 | 49133375 | 49121394 | 49131582 | 27 |
| USP19   | 0.0226 | 0.9991 | C-I  | 2Mb | 3p21.31 | NM_001199160 | 49121109 | 49133375 | 49121394 | 49131582 | 27 |
| USP19   | 0.0226 | 0.9991 | C-I  | 2Mb | 3p21.31 | NM_001199160 | 49121109 | 49133375 | 49121394 | 49131582 | 27 |
| LAMB2   | 0.0111 | 1.0000 | ADGC | 1Mb | 3p21.31 | NM_002292    | 49133550 | 49145603 | 49133662 | 49145304 | 32 |
| LAMB2   | 0.0014 | 0.1982 | C-I  | 3Mb | 3p21.31 | NM_002292    | 49133550 | 49145603 | 49133662 | 49145304 | 32 |
| LAMB2   | 0.0226 | 0.9991 | C-I  | 2Mb | 3p21.31 | NM_002292    | 49133550 | 49145603 | 49133662 | 49145304 | 32 |
| LAMB2P1 | 0.0111 | 1.0000 | ADGC | 1Mb | 3p21.31 | NR_004405    | 49165295 | 49166838 | 49166838 | 49166838 | 1  |
| LAMB2P1 | 0.0014 | 0.1982 | C-I  | 3Mb | 3p21.31 | NR_004405    | 49165295 | 49166838 | 49166838 | 49166838 | 1  |
| LAMB2P1 | 0.0226 | 0.9991 | C-I  | 2Mb | 3p21.31 | NR_004405    | 49165295 | 49166838 | 49166838 | 49166838 | 1  |
| CCDC71  | 0.0111 | 1.0000 | ADGC | 1Mb | 3p21.31 | NM_022903    | 49174971 | 49178789 | 49175241 | 49176645 | 2  |
| CCDC71  | 0.0014 | 0.1982 | C-I  | 3Mb | 3p21.31 | NM_022903    | 49174971 | 49178789 | 49175241 | 49176645 | 2  |
| CCDC71  | 0.0226 | 0.9991 | C-I  | 2Mb | 3p21.31 | NM_022903    | 49174971 | 49178789 | 49175241 | 49176645 | 2  |
| KLHDC8B | 0.0132 | 1.0000 | ADGC | 1Mb | 3p21.31 | NM_173546    | 49184021 | 49188923 | 49185206 | 49188238 | 6  |
| KLHDC8B | 0.0014 | 0.1982 | C-I  | 3Mb | 3p21.31 | NM_173546    | 49184021 | 49188923 | 49185206 | 49188238 | 6  |
| KLHDC8B | 0.0226 | 0.9991 | C-I  | 2Mb | 3p21.31 | NM_173546    | 49184021 | 49188923 | 49185206 | 49188238 | 6  |
| C3orf84 | 0.0132 | 1.0000 | ADGC | 1Mb | 3p21.31 | NM_001080528 | 49190072 | 49204295 | 49190072 | 49204208 | 4  |
| C3orf84 | 0.0014 | 0.1982 | C-I  | 3Mb | 3p21.31 | NM_001080528 | 49190072 | 49204295 | 49190072 | 49204208 | 4  |
| C3orf84 | 0.0226 | 0.9991 | C-I  | 2Mb | 3p21.31 | NM_001080528 | 49190072 | 49204295 | 49190072 | 49204208 | 4  |
| CCDC36  | 0.0138 | 1.0000 | ADGC | 1Mb | 3p21.31 | NM_178173    | 49210864 | 49270541 | 49224217 | 49269719 | 10 |
| CCDC36  | 0.0138 | 1.0000 | ADGC | 1Mb | 3p21.31 | NM_178173    | 49210864 | 49270541 | 49224217 | 49269719 | 10 |
| CCDC36  | 0.0014 | 0.1982 | C-I  | 3Mb | 3p21.31 | NM_178173    | 49210864 | 49270541 | 49224217 | 49269719 | 10 |
| CCDC36  | 0.0014 | 0.1982 | C-I  | 3Mb | 3p21.31 | NM_178173    | 49210864 | 49270541 | 49224217 | 49269719 | 10 |
| CCDC36  | 0.0166 | 0.9990 | C-I  | 2Mb | 3p21.31 | NM_178173    | 49210864 | 49270541 | 49224217 | 49269719 | 10 |
| CCDC36  | 0.0166 | 0.9990 | C-I  | 2Mb | 3p21.31 | NM_178173    | 49210864 | 49270541 | 49224217 | 49269719 | 10 |
| CCDC36  | 0.0138 | 1.0000 | ADGC | 1Mb | 3p21.31 | NM_001135197 | 49211936 | 49270541 | 49224217 | 49269719 | 8  |

|         |        |        |      |     |         |              |          |          |          |          |    |
|---------|--------|--------|------|-----|---------|--------------|----------|----------|----------|----------|----|
| CCDC36  | 0.0138 | 1.0000 | ADGC | 1Mb | 3p21.31 | NM_001135197 | 49211936 | 49270541 | 49224217 | 49269719 | 8  |
| CCDC36  | 0.0014 | 0.1982 | C-I  | 3Mb | 3p21.31 | NM_001135197 | 49211936 | 49270541 | 49224217 | 49269719 | 8  |
| CCDC36  | 0.0014 | 0.1982 | C-I  | 3Mb | 3p21.31 | NM_001135197 | 49211936 | 49270541 | 49224217 | 49269719 | 8  |
| CCDC36  | 0.0166 | 0.9990 | C-I  | 2Mb | 3p21.31 | NM_001135197 | 49211936 | 49270541 | 49224217 | 49269719 | 8  |
| CCDC36  | 0.0166 | 0.9990 | C-I  | 2Mb | 3p21.31 | NM_001135197 | 49211936 | 49270541 | 49224217 | 49269719 | 8  |
| C3orf62 | 0.0138 | 1.0000 | ADGC | 1Mb | 3p21.31 | NM_198562    | 49281033 | 49289512 | 49283616 | 49289309 | 3  |
| C3orf62 | 0.0014 | 0.1982 | C-I  | 3Mb | 3p21.31 | NM_198562    | 49281033 | 49289512 | 49283616 | 49289309 | 3  |
| C3orf62 | 0.0166 | 0.9990 | C-I  | 2Mb | 3p21.31 | NM_198562    | 49281033 | 49289512 | 49283616 | 49289309 | 3  |
| MIR4271 | 0.0138 | 1.0000 | ADGC | 1Mb | 3p21.31 | NR_036233    | 49286556 | 49286623 | 49286623 | 49286623 | 1  |
| MIR4271 | 0.0014 | 0.1982 | C-I  | 3Mb | 3p21.31 | NR_036233    | 49286556 | 49286623 | 49286623 | 49286623 | 1  |
| MIR4271 | 0.0166 | 0.9990 | C-I  | 2Mb | 3p21.31 | NR_036233    | 49286556 | 49286623 | 49286623 | 49286623 | 1  |
| USP4    | 0.0141 | 1.0000 | ADGC | 1Mb | 3p21.31 | NM_199443    | 49289580 | 49352540 | 49290729 | 49352461 | 21 |
| USP4    | 0.0141 | 1.0000 | ADGC | 1Mb | 3p21.31 | NM_199443    | 49289580 | 49352540 | 49290729 | 49352461 | 21 |
| USP4    | 0.0014 | 0.1982 | C-I  | 3Mb | 3p21.31 | NM_199443    | 49289580 | 49352540 | 49290729 | 49352461 | 21 |
| USP4    | 0.0014 | 0.1982 | C-I  | 3Mb | 3p21.31 | NM_199443    | 49289580 | 49352540 | 49290729 | 49352461 | 21 |
| USP4    | 0.0166 | 0.9990 | C-I  | 2Mb | 3p21.31 | NM_199443    | 49289580 | 49352540 | 49290729 | 49352461 | 21 |
| USP4    | 0.0166 | 0.9990 | C-I  | 2Mb | 3p21.31 | NM_199443    | 49289580 | 49352540 | 49290729 | 49352461 | 21 |
| USP4    | 0.0093 | 1.0000 | ADGC | 1Mb | 3p21.31 | NM_001251877 | 49324221 | 49352540 | 49324803 | 49352461 | 7  |
| USP4    | 0.0093 | 1.0000 | ADGC | 1Mb | 3p21.31 | NM_001251877 | 49324221 | 49352540 | 49324803 | 49352461 | 7  |
| USP4    | 0.0014 | 0.1982 | C-I  | 3Mb | 3p21.31 | NM_001251877 | 49324221 | 49352540 | 49324803 | 49352461 | 7  |
| USP4    | 0.0014 | 0.1982 | C-I  | 3Mb | 3p21.31 | NM_001251877 | 49324221 | 49352540 | 49324803 | 49352461 | 7  |
| USP4    | 0.0126 | 0.9977 | C-I  | 2Mb | 3p21.31 | NM_001251877 | 49324221 | 49352540 | 49324803 | 49352461 | 7  |
| USP4    | 0.0126 | 0.9977 | C-I  | 2Mb | 3p21.31 | NM_001251877 | 49324221 | 49352540 | 49324803 | 49352461 | 7  |
| GPX1    | 0.0094 | 1.0000 | ADGC | 1Mb | 3p21.31 | NM_000581    | 49369612 | 49370795 | 49369824 | 49370715 | 2  |
| GPX1    | 0.0014 | 0.1982 | C-I  | 3Mb | 3p21.31 | NM_000581    | 49369612 | 49370795 | 49369824 | 49370715 | 2  |
| GPX1    | 0.0126 | 0.9977 | C-I  | 2Mb | 3p21.31 | NM_000581    | 49369612 | 49370795 | 49369824 | 49370715 | 2  |
| RHOA    | 0.0094 | 1.0000 | ADGC | 1Mb | 3p21.31 | NM_001664    | 49371582 | 49424530 | 49372645 | 49388026 | 5  |
| RHOA    | 0.0014 | 0.1982 | C-I  | 3Mb | 3p21.31 | NM_001664    | 49371582 | 49424530 | 49372645 | 49388026 | 5  |
| RHOA    | 0.0126 | 0.9977 | C-I  | 2Mb | 3p21.31 | NM_001664    | 49371582 | 49424530 | 49372645 | 49388026 | 5  |
| TCTA    | 0.0094 | 1.0000 | ADGC | 1Mb | 3p21.31 | NM_022171    | 49424642 | 49428913 | 49424863 | 49427299 | 3  |
| TCTA    | 0.0014 | 0.1982 | C-I  | 3Mb | 3p21.31 | NM_022171    | 49424642 | 49428913 | 49424863 | 49427299 | 3  |
| TCTA    | 0.0126 | 0.9977 | C-I  | 2Mb | 3p21.31 | NM_022171    | 49424642 | 49428913 | 49424863 | 49427299 | 3  |
| AMT     | 0.0094 | 1.0000 | ADGC | 1Mb | 3p21.31 | NM_001164712 | 49429214 | 49435115 | 49429780 | 49434887 | 10 |
| AMT     | 0.0014 | 0.1982 | C-I  | 3Mb | 3p21.31 | NM_001164712 | 49429214 | 49435115 | 49429780 | 49434887 | 10 |
| AMT     | 0.0126 | 0.9977 | C-I  | 2Mb | 3p21.31 | NM_001164712 | 49429214 | 49435115 | 49429780 | 49434887 | 10 |
| NICN1   | 0.0094 | 1.0000 | ADGC | 1Mb | 3p21.31 | NM_032316    | 49434769 | 49441761 | 49437269 | 49441676 | 6  |
| NICN1   | 0.0014 | 0.1982 | C-I  | 3Mb | 3p21.31 | NM_032316    | 49434769 | 49441761 | 49437269 | 49441676 | 6  |
| NICN1   | 0.0126 | 0.9977 | C-I  | 2Mb | 3p21.31 | NM_032316    | 49434769 | 49441761 | 49437269 | 49441676 | 6  |
| DAG1    | 0.0094 | 1.0000 | ADGC | 1Mb | 3p21.31 | NM_001177643 | 49481139 | 49548055 | 49522971 | 49545636 | 3  |
| DAG1    | 0.0094 | 1.0000 | ADGC | 1Mb | 3p21.31 | NM_001177643 | 49481139 | 49548055 | 49522971 | 49545636 | 3  |
| DAG1    | 0.0014 | 0.1982 | C-I  | 3Mb | 3p21.31 | NM_001177643 | 49481139 | 49548055 | 49522971 | 49545636 | 3  |
| DAG1    | 0.0014 | 0.1982 | C-I  | 3Mb | 3p21.31 | NM_001177643 | 49481139 | 49548055 | 49522971 | 49545636 | 3  |
| DAG1    | 0.0126 | 0.9977 | C-I  | 2Mb | 3p21.31 | NM_001177643 | 49481139 | 49548055 | 49522971 | 49545636 | 3  |
| DAG1    | 0.0126 | 0.9977 | C-I  | 2Mb | 3p21.31 | NM_001177643 | 49481139 | 49548055 | 49522971 | 49545636 | 3  |
| DAG1    | 0.0094 | 1.0000 | ADGC | 1Mb | 3p21.31 | NM_001177644 | 49482568 | 49548055 | 49522971 | 49545636 | 3  |
| DAG1    | 0.0094 | 1.0000 | ADGC | 1Mb | 3p21.31 | NM_001177644 | 49482568 | 49548055 | 49522971 | 49545636 | 3  |
| DAG1    | 0.0014 | 0.1982 | C-I  | 3Mb | 3p21.31 | NM_001177644 | 49482568 | 49548055 | 49522971 | 49545636 | 3  |
| DAG1    | 0.0014 | 0.1982 | C-I  | 3Mb | 3p21.31 | NM_001177644 | 49482568 | 49548055 | 49522971 | 49545636 | 3  |
| DAG1    | 0.0126 | 0.9977 | C-I  | 2Mb | 3p21.31 | NM_001177644 | 49482568 | 49548055 | 49522971 | 49545636 | 3  |
| DAG1    | 0.0126 | 0.9977 | C-I  | 2Mb | 3p21.31 | NM_001177644 | 49482568 | 49548055 | 49522971 | 49545636 | 3  |
| BSN-AS2 | 0.0160 | 1.0000 | ADGC | 1Mb | 3p21.31 | NR_038866    | 49561742 | 49566803 | 49566803 | 49566803 | 3  |
| BSN-AS2 | 0.0160 | 1.0000 | ADGC | 1Mb | 3p21.31 | NR_038866    | 49561742 | 49566803 | 49566803 | 49566803 | 3  |
| BSN-AS2 | 0.0014 | 0.1982 | C-I  | 3Mb | 3p21.31 | NR_038866    | 49561742 | 49566803 | 49566803 | 49566803 | 3  |
| BSN-AS2 | 0.0014 | 0.1982 | C-I  | 3Mb | 3p21.31 | NR_038866    | 49561742 | 49566803 | 49566803 | 49566803 | 3  |
| BSN-AS2 | 0.0126 | 0.9977 | C-I  | 2Mb | 3p21.31 | NR_038866    | 49561742 | 49566803 | 49566803 | 49566803 | 3  |
| BSN-AS2 | 0.0126 | 0.9977 | C-I  | 2Mb | 3p21.31 | NR_038866    | 49561742 | 49566803 | 49566803 | 49566803 | 3  |
| BSN     | 0.0184 | 1.0000 | ADGC | 1Mb | 3p21.31 | NM_003458    | 49566925 | 49683986 | 49567039 | 49677276 | 12 |
| BSN     | 0.0014 | 0.1982 | C-I  | 3Mb | 3p21.31 | NM_003458    | 49566925 | 49683986 | 49567039 | 49677276 | 12 |
| BSN     | 0.0221 | 0.9991 | C-I  | 2Mb | 3p21.31 | NM_003458    | 49566925 | 49683986 | 49567039 | 49677276 | 12 |
| APEH    | 0.0138 | 1.0000 | ADGC | 1Mb | 3p21.31 | NM_001640    | 49686438 | 49695938 | 49686838 | 49695779 | 22 |
| APEH    | 0.0014 | 0.1982 | C-I  | 3Mb | 3p21.31 | NM_001640    | 49686438 | 49695938 | 49686838 | 49695779 | 22 |
| APEH    | 0.0389 | 1.0000 | C-I  | 2Mb | 3p21.31 | NM_001640    | 49686438 | 49695938 | 49686838 | 49695779 | 22 |
| MST1    | 0.0339 | 1.0000 | ADGC | 1Mb | 3p21.31 | NM_020998    | 49696383 | 49701200 | 49696464 | 49701128 | 18 |

© 2015 American Medical Association. All rights reserved.



|          |        |        |      |     |           |              |          |          |          |          |    |
|----------|--------|--------|------|-----|-----------|--------------|----------|----------|----------|----------|----|
| MST1     | 0.0014 | 0.1982 | C-I  | 3Mb | 3p21.31   | NM_020998    | 49696383 | 49701200 | 49696464 | 49701128 | 18 |
| MST1     | 0.0389 | 1.0000 | C-I  | 2Mb | 3p21.31   | NM_020998    | 49696383 | 49701200 | 49696464 | 49701128 | 18 |
| RBM6     | 0.0440 | 1.0000 | ADGC | 2Mb | 3p21.31   | NM_005777    | 49952480 | 50089689 | 49975078 | 50089570 | 21 |
| RBM6     | 0.0014 | 0.1982 | C-I  | 3Mb | 3p21.31   | NM_005777    | 49952480 | 50089689 | 49975078 | 50089570 | 21 |
| RBM5     | 0.0440 | 1.0000 | ADGC | 2Mb | 3p21.31   | NR_036627    | 50101344 | 50131401 | 50131401 | 50131401 | 24 |
| RBM5     | 0.0014 | 0.1982 | C-I  | 3Mb | 3p21.31   | NR_036627    | 50101344 | 50131401 | 50131401 | 50131401 | 24 |
| RBM5-AS1 | 0.0440 | 1.0000 | ADGC | 2Mb | 3p21.31   | NR_045388    | 50112039 | 50113425 | 50113425 | 50113425 | 1  |
| RBM5-AS1 | 0.0440 | 1.0000 | ADGC | 2Mb | 3p21.31   | NR_045388    | 50112039 | 50113425 | 50113425 | 50113425 | 1  |
| RBM5-AS1 | 0.0014 | 0.1982 | C-I  | 3Mb | 3p21.31   | NR_045388    | 50112039 | 50113425 | 50113425 | 50113425 | 1  |
| RBM5-AS1 | 0.0014 | 0.1982 | C-I  | 3Mb | 3p21.31   | NR_045388    | 50112039 | 50113425 | 50113425 | 50113425 | 1  |
| HCN4     | 0.0294 | 1.0000 | ADGC | 1Mb | 15q24-q25 | NM_005477    | 71399252 | 71448658 | 71401874 | 71447664 | 8  |
| HCN4     | 0.0271 | 1.0000 | C-I  | 1Mb | 15q24-q25 | NM_005477    | 71399252 | 71448658 | 71401874 | 71447664 | 8  |
| REC114   | 0.0214 | 1.0000 | ADGC | 1Mb | 15q24.1   | NM_001042367 | 71522551 | 71639406 | 71522579 | 71639310 | 6  |
| REC114   | 0.0205 | 1.0000 | C-I  | 1Mb | 15q24.1   | NM_001042367 | 71522551 | 71639406 | 71522579 | 71639310 | 6  |
| CD276    | 0.0452 | 1.0000 | ADGC | 1Mb | 15q23-q24 | NM_025240    | 71763674 | 71793912 | 71779033 | 71792350 | 8  |
| CD276    | 0.0030 | 0.9805 | C-I  | 1Mb | 15q23-q24 | NM_025240    | 71763674 | 71793912 | 71779033 | 71792350 | 8  |
| CD276    | 0.0294 | 0.9952 | C-I  | 2Mb | 15q23-q24 | NM_025240    | 71763674 | 71793912 | 71779033 | 71792350 | 8  |
| ZFP14    | 0.0339 | 1.0000 | ADGC | 1Mb | 19q13.12  | NM_020917    | 41517194 | 41561945 | 41522965 | 41550634 | 5  |
| ZFP14    | 0.0382 | 1.0000 | C-I  | 1Mb | 19q13.12  | NM_020917    | 41517194 | 41561945 | 41522965 | 41550634 | 5  |

**eTable 6.** Potentially Damaging SNPs (With Their SIFT and Polyphen Scores For Missense Variants) Within the Canonical Transcripts of the Genes Inside the Consensus Regions Identified in the ADGC and CHAP-Indianapolis Data Sets; with their minor allele frequency in 1000Genomes combined population (GMAF), African American (AA\_MAF), African (AFR\_MAF), American (AMR\_MAF), Asian (ASN\_MAF), European (EUR\_MAF) and European American (EA\_MAF).

| SNP         | Gene    | Consequence                          | SIFT              | PolyPhen                 | GMAF     | AA_MAF     | AFR_MAF  | AMR_MAF  | ASN_MAF  | EUR_MAF  | EA_MAF     |
|-------------|---------|--------------------------------------|-------------------|--------------------------|----------|------------|----------|----------|----------|----------|------------|
| rs145488707 | STOML1  | missense_variant                     | deleterious(0)    | probably_damaging(1)     | -        | T:0        | -        | -        | -        | -        | T:0.000116 |
| rs371570677 | STOML1  | missense_variant                     | deleterious(0)    | probably_damaging(0.993) | -        | A:0        | -        | -        | -        | -        | A:0.000116 |
| rs1061082   | STOML1  | missense_variant                     | deleterious(0.01) | probably_damaging(0.996) | -        | -          | -        | -        | -        | -        | -          |
| rs146505992 | STOML1  | missense_variant                     | deleterious(0.01) | benign(0.052)            | -        | A:0        | -        | -        | -        | -        | A:0.000116 |
| rs141134528 | STOML1  | missense_variant                     | tolerated(0.2)    | possibly_damaging(0.641) | -        | C:0.000227 | -        | -        | -        | -        | C:0        |
| rs368495173 | STOML1  | missense_variant                     | deleterious(0.05) | possibly_damaging(0.67)  | -        | A:0.000227 | -        | -        | -        | -        | A:0        |
| rs148196033 | STOML1  | missense_variant                     | deleterious(0.02) | benign(0.394)            | -        | G:0.000682 | -        | -        | -        | -        | G:0        |
| rs141171144 | STOML1  | missense_variant                     | tolerated(0.1)    | probably_damaging(0.958) | -        | T:0.000455 | -        | -        | -        | -        | T:0.000349 |
| rs2277600   | STOML1  | missense_variant                     | deleterious(0.02) | possibly_damaging(0.803) | -        | -          | -        | -        | -        | -        | -          |
| rs34524642  | STOML1  | frameshift_variant                   | -                 | -                        | -        | -          | -        | -        | -        | -        | -          |
| rs151058454 | STOML1  | missense_variant                     | deleterious(0.01) | benign(0.283)            | -        | T:0.002983 | -        | -        | -        | -        | T:0        |
| rs373693671 | STOML1  | missense_variant                     | deleterious(0)    | possibly_damaging(0.871) | -        | A:0.000461 | -        | -        | -        | -        | A:0.000234 |
| rs368108098 | STOML1  | missense_variant                     | deleterious(0.02) | possibly_damaging(0.785) | -        | A:0        | -        | -        | -        | -        | A:0.000118 |
| rs114483410 | STOML1  | missense_variant                     | deleterious(0)    | benign(0)                | A:0.0005 | A:0        | A:0.0020 | -        | -        | -        | A:0.000116 |
| rs116083516 | STOML1  | missense_variant                     | deleterious(0)    | probably_damaging(0.979) | A:0.0000 | -          | -        | -        | -        | -        | -          |
| rs199575995 | STOML1  | missense_variant                     | deleterious(0.01) | benign(0.221)            | -        | -          | -        | -        | -        | -        | -          |
| rs150164503 | STOML1  | missense_variant                     | deleterious(0.03) | possibly_damaging(0.671) | -        | A:0        | -        | -        | -        | -        | A:0.000116 |
| rs200693933 | STOML1  | missense_variant                     | tolerated(0.08)   | possibly_damaging(0.686) | -        | -          | -        | -        | -        | -        | -          |
| rs112182005 | STOML1  | missense_variant                     | deleterious(0)    | benign(0.211)            | -        | -          | -        | -        | -        | -        | -          |
| rs143464424 | STOML1  | missense_variant                     | tolerated(0.07)   | possibly_damaging(0.472) | -        | A:0.000227 | -        | -        | -        | -        | A:0        |
| rs369331084 | STOML1  | missense_variant                     | deleterious(0.01) | possibly_damaging(0.879) | -        | T:0        | -        | -        | -        | -        | T:0.000116 |
| rs137978751 | STOML1  | missense_variant                     | tolerated(0.11)   | possibly_damaging(0.748) | -        | T:0        | -        | -        | -        | -        | T:0.000233 |
| rs200662895 | STOML1  | missense_variant                     | tolerated(0.17)   | possibly_damaging(0.677) | -        | -          | -        | -        | -        | -        | -          |
| rs199911341 | STOML1  | missense_variant                     | deleterious(0.01) | possibly_damaging(0.822) | -        | A:0        | -        | -        | -        | -        | A:0.000350 |
| rs34228316  | PML     | frameshift_variant                   | -                 | -                        | -        | -          | -        | -        | -        | -        | -          |
| rs372639541 | PML     | missense_variant                     | tolerated(0.08)   | probably_damaging(0.999) | -        | G:0        | -        | -        | -        | -        | G:0.000116 |
| rs141544943 | PML     | missense_variant                     | deleterious(0)    | probably_damaging(0.931) | -        | T:0        | -        | -        | -        | -        | T:0.000116 |
| rs370861713 | PML     | missense_variant                     | tolerated(0.11)   | probably_damaging(0.926) | -        | G:0        | -        | -        | -        | -        | G:0.000116 |
| rs200708179 | PML     | missense_variant                     | deleterious(0)    | probably_damaging(0.981) | A:0.0000 | -          | -        | -        | -        | -        | -          |
| rs368684793 | PML     | missense_variant                     | tolerated(0.06)   | possibly_damaging(0.573) | -        | G:0        | -        | -        | -        | -        | G:0.000116 |
| rs200143816 | PML     | missense_variant                     | tolerated(0.16)   | probably_damaging(0.984) | -        | -          | -        | -        | -        | -        | -          |
| rs373742710 | PML     | missense_variant                     | tolerated(0.06)   | probably_damaging(0.918) | -        | A:0        | -        | -        | -        | -        | A:0.000116 |
| rs138345086 | PML     | missense_variant                     | deleterious(0.01) | probably_damaging(0.928) | -        | T:0        | -        | -        | -        | -        | T:0.000116 |
| rs34681920  | PML     | frameshift_variant                   | -                 | -                        | -        | -          | -        | -        | -        | -        | -          |
| rs140050477 | PML     | missense_variant                     | deleterious(0.01) | benign(0.219)            | -        | T:0.000456 | -        | -        | -        | -        | T:0.001289 |
| rs377549937 | PML     | missense_variant                     | deleterious(0.02) | possibly_damaging(0.632) | -        | T:0.000228 | -        | -        | -        | -        | T:0        |
| rs371084483 | PML     | missense_variant                     | deleterious(0.02) | benign(0.386)            | -        | G:0        | -        | -        | -        | -        | G:0.000117 |
| rs199516006 | PML     | missense_variant                     | tolerated(0.07)   | possibly_damaging(0.777) | A:0.0005 | -          | -        | -        | A:0.0017 | -        | -          |
| rs375594567 | PML     | missense_variant                     | deleterious(0.03) | benign(0.168)            | -        | A:0        | -        | -        | -        | -        | A:0.000117 |
| rs74471420  | PML     | missense_variant                     | deleterious(0.04) | probably_damaging(0.977) | -        | -          | -        | -        | -        | -        | -          |
| rs371413149 | PML     | missense_variant                     | deleterious(0.02) | possibly_damaging(0.458) | -        | A:0        | -        | -        | -        | -        | A:0.000116 |
| rs149871195 | PML     | missense_variant                     | deleterious(0.03) | benign(0.219)            | A:0.0005 | A:0.000228 | A:0.0020 | -        | -        | -        | A:0        |
| rs145863996 | PML     | missense_variant                     | deleterious(0.01) | possibly_damaging(0.828) | -        | C:0        | -        | -        | -        | -        | C:0.000233 |
| rs11555843  | PML     | missense_variant                     | tolerated(0.09)   | possibly_damaging(0.776) | -        | A:0        | -        | -        | -        | -        | A:0.000465 |
| rs143771296 | PML     | missense_variant                     | deleterious(0)    | probably_damaging(0.998) | -        | T:0.000227 | -        | -        | -        | -        | T:0        |
| rs200123201 | PML     | missense_variant                     | deleterious(0.05) | benign(0.298)            | T:0.0005 | -          | -        | -        | -        | T:0.0013 | -          |
| rs202019975 | PML     | missense_variant                     | deleterious(0)    | benign(0.033)            | T:0.0005 | -          | -        | -        | -        | T:0.0013 | -          |
| rs374199653 | PML     | missense_variant                     | deleterious(0.01) | benign(0.12)             | -        | A:0        | -        | -        | -        | -        | A:0.000116 |
| rs200546578 | PML     | missense_variant                     | deleterious(0.04) | benign(0.219)            | A:0.0005 | -          | A:0.0020 | -        | -        | -        | -          |
| rs375611361 | PML     | missense_variant                     | deleterious(0)    | probably_damaging(0.992) | -        | A:0        | -        | -        | -        | -        | A:0.000116 |
| rs193112596 | PML     | splice_region_variant,intron_variant | -                 | -                        | A:0.0005 | -          | -        | -        | -        | A:0.0013 | -          |
| rs147197708 | PML     | missense_variant                     | deleterious(0)    | probably_damaging(0.991) | -        | C:0        | -        | -        | -        | -        | C:0.000116 |
| rs140558473 | PML     | missense_variant                     | deleterious(0.01) | probably_damaging(0.997) | -        | G:0.000227 | -        | -        | -        | -        | G:0        |
| rs373236341 | PML     | missense_variant                     | deleterious(0.01) | benign(0.266)            | -        | -          | -        | -        | -        | -        | -          |
| rs142900813 | PML     | missense_variant                     | deleterious(0.01) | possibly_damaging(0.591) | T:0.0009 | T:0        | T:0.0020 | T:0.0028 | -        | -        | T:0.000233 |
| rs373296015 | PML     | missense_variant                     | deleterious(0)    | probably_damaging(0.935) | -        | G:0        | -        | -        | -        | -        | G:0.000116 |
| rs112105465 | PML     | missense_variant                     | deleterious(0.02) | possibly_damaging(0.838) | -        | -          | -        | -        | -        | -        | -          |
| rs138817062 | PML     | missense_variant                     | deleterious(0.04) | benign(0.001)            | -        | T:0        | -        | -        | -        | -        | T:0.000116 |
| rs368187335 | GOLGA6A | missense_variant                     | deleterious(0)    | probably_damaging(0.994) | -        | G:0.011396 | -        | -        | -        | -        | G:0.000163 |
| rs375959536 | GOLGA6A | missense_variant                     | deleterious(0.04) | benign(0.209)            | -        | G:0        | -        | -        | -        | -        | G:0.000119 |
| rs369741080 | GOLGA6A | missense_variant                     | deleterious(0.03) | possibly_damaging(0.477) | -        | T:0        | -        | -        | -        | -        | T:0.000190 |
| rs370452591 | GOLGA6A | missense_variant                     | deleterious(0.01) | possibly_damaging(0.747) | -        | C:0        | -        | -        | -        | -        | C:0.000125 |
| rs199527610 | GOLGA6A | missense_variant                     | tolerated(0.17)   | possibly_damaging(0.492) | -        | -          | -        | -        | -        | -        | -          |
| rs374121270 | GOLGA6A | missense_variant                     | tolerated(0.09)   | possibly_damaging(0.885) | -        | A:0        | -        | -        | -        | -        | A:0.000117 |
| rs376685732 | GOLGA6A | missense_variant                     | deleterious(0.02) | benign(0.051)            | -        | C:0.000455 | -        | -        | -        | -        | C:0        |
| rs370916628 | GOLGA6A | missense_variant                     | deleterious(0.03) | benign(0.055)            | -        | C:0        | -        | -        | -        | -        | C:0.000117 |

© 2015 American Medical Association. All rights reserved.

|             |         |                                             |                   |                          |          |            |          |        |          |          |            |
|-------------|---------|---------------------------------------------|-------------------|--------------------------|----------|------------|----------|--------|----------|----------|------------|
| rs372622676 | GOLGA6A | missense_variant                            | deleterious(0.04) | benign(0.009)            | -        | A:0        | -        | -      | -        | -        | A:0.000117 |
| rs149223222 | GOLGA6A | missense_variant                            | deleterious(0.01) | benign(0.295)            | -        | -          | -        | -      | -        | -        | -          |
| rs142259530 | ISLR2   | missense_variant                            | deleterious(0.03) | benign(0.289)            | -        | C:0        | -        | -      | -        | -        | C:0.000116 |
| rs370327397 | ISLR2   | missense_variant                            | deleterious(0.04) | probably_damaging(0.996) | -        | T:0        | -        | -      | -        | -        | T:0.000116 |
| rs201306990 | ISLR2   | missense_variant                            | tolerated(0.07)   | probably_damaging(0.998) | -        | -          | -        | -      | -        | -        | -          |
| rs371096859 | ISLR2   | missense_variant                            | tolerated(0.2)    | probably_damaging(0.997) | -        | A:0        | -        | -      | -        | -        | A:0.000116 |
| rs201469990 | ISLR2   | missense_variant                            | deleterious(0.01) | probably_damaging(0.999) | -        | -          | -        | -      | -        | -        | -          |
| rs150353936 | ISLR2   | missense_variant                            | tolerated(0.14)   | possibly_damaging(0.515) | -        | A:0.000227 | -        | -      | -        | -        | A:0        |
| rs3889598   | ISLR2   | missense_variant                            | tolerated(0.57)   | probably_damaging(0.977) | T:0.0349 | T:0.041401 | T:0.07   | T:0.02 | T:0.03   | T:0.02   | T:0.014312 |
| rs374707959 | ISLR2   | missense_variant                            | deleterious(0.01) | probably_damaging(0.998) | -        | G:0        | -        | -      | -        | -        | G:0.000116 |
| rs149537427 | ISLR2   | missense_variant                            | tolerated(0.35)   | possibly_damaging(0.673) | -        | A:0        | -        | -      | -        | -        | A:0.000465 |
| rs368814186 | ISLR2   | missense_variant                            | tolerated(0.08)   | possibly_damaging(0.537) | -        | G:0        | -        | -      | -        | -        | G:0.000116 |
| rs202205145 | ISLR2   | missense_variant                            | tolerated(0.22)   | probably_damaging(0.999) | -        | T:0.000227 | -        | -      | -        | -        | T:0.000116 |
| rs368024378 | ISLR2   | missense_variant                            | tolerated(0.07)   | probably_damaging(1)     | -        | C:0        | -        | -      | -        | -        | C:0.000116 |
| rs5813743   | ISLR2   | frameshift_variant                          | -                 | -                        | -        | -          | -        | -      | -        | -        | -          |
| rs201210704 | ISLR2   | missense_variant                            | tolerated(0.97)   | probably_damaging(0.93)  | G:0.0014 | -          | G:0.01   | -      | -        | -        | -          |
| rs369322354 | ISLR2   | missense_variant                            | tolerated(1)      | probably_damaging(0.97)  | -        | C:0        | -        | -      | -        | -        | C:0.000116 |
| rs113946470 | ISLR2   | missense_variant                            | tolerated(0.14)   | probably_damaging(0.985) | -        | -          | -        | -      | -        | -        | -          |
| rs373225895 | ISLR2   | missense_variant                            | deleterious(0)    | benign(0.079)            | -        | A:0        | -        | -      | -        | -        | A:0.000118 |
| rs374669132 | ISLR2   | missense_variant                            | deleterious(0.03) | probably_damaging(0.968) | -        | G:0.000227 | -        | -      | -        | -        | G:0        |
| rs145379981 | ISLR2   | missense_variant                            | deleterious(0.02) | probably_damaging(0.996) | -        | A:0        | -        | -      | -        | -        | A:0.000116 |
| rs372926193 | ISLR2   | missense_variant                            | deleterious(0)    | probably_damaging(0.999) | -        | C:0        | -        | -      | -        | -        | C:0.000116 |
| rs185463025 | ISLR2   | missense_variant                            | tolerated(0.08)   | probably_damaging(0.991) | A:0.0009 | A:0.000455 | A:0.0041 | -      | -        | -        | A:0        |
| rs200999608 | ISLR2   | missense_variant                            | tolerated(0.27)   | probably_damaging(0.986) | G:0.0005 | -          | -        | -      | -        | G:0.0013 | -          |
| rs144880828 | ISLR2   | missense_variant                            | deleterious(0.03) | probably_damaging(0.968) | -        | G:0        | -        | -      | -        | -        | G:0.000116 |
| rs138774937 | ISLR2   | missense_variant                            | deleterious(0)    | probably_damaging(0.98)  | -        | G:0.000456 | -        | -      | -        | -        | G:0        |
| rs376663143 | RPS3A   | missense_variant                            | tolerated(0.07)   | possibly_damaging(0.816) | -        | C:0.000227 | -        | -      | -        | -        | C:0        |
| rs199694166 | SH3D19  | missense_variant                            | deleterious(0.01) | benign(0.008)            | -        | -          | -        | -      | -        | -        | -          |
| rs146787893 | SH3D19  | missense_variant                            | deleterious(0.01) | probably_damaging(0.992) | -        | G:0.000227 | -        | -      | -        | -        | G:0        |
| rs191202111 | SH3D19  | missense_variant                            | deleterious(0)    | probably_damaging(0.979) | C:0.0005 | -          | C:0.0020 | -      | -        | -        | -          |
| rs376090399 | SH3D19  | missense_variant                            | deleterious(0.02) | benign(0.341)            | -        | T:0        | -        | -      | -        | -        | T:0.000116 |
| rs142870105 | SH3D19  | missense_variant                            | deleterious(0)    | probably_damaging(0.999) | -        | T:0.002270 | -        | -      | -        | -        | T:0        |
| rs376194040 | SH3D19  | missense_variant                            | deleterious(0)    | benign(0.103)            | -        | A:0        | -        | -      | -        | -        | A:0.000116 |
| rs370276794 | SH3D19  | missense_variant                            | tolerated(0.43)   | possibly_damaging(0.812) | -        | C:0        | -        | -      | -        | -        | C:0.000116 |
| rs192063486 | SH3D19  | missense_variant                            | tolerated(0.07)   | probably_damaging(0.961) | A:0.0014 | -          | -        | A:0.01 | -        | -        | -          |
| rs200083226 | SH3D19  | missense_variant                            | deleterious(0.04) | benign(0.013)            | G:0.0005 | -          | -        | -      | -        | G:0.0013 | -          |
| rs371735565 | SH3D19  | missense_variant                            | deleterious(0.01) | probably_damaging(0.988) | -        | T:0        | -        | -      | -        | -        | T:0.000116 |
| rs372532779 | SH3D19  | missense_variant                            | deleterious(0.05) | possibly_damaging(0.764) | -        | T:0        | -        | -      | -        | -        | T:0.000116 |
| rs372072781 | SH3D19  | missense_variant                            | deleterious(0)    | possibly_damaging(0.721) | -        | C:0.000227 | -        | -      | -        | -        | C:0        |
| rs150249923 | SH3D19  | missense_variant                            | deleterious(0)    | possibly_damaging(0.703) | -        | A:0        | -        | -      | -        | -        | A:0.000116 |
| rs183339685 | SH3D19  | missense_variant                            | tolerated(0.81)   | possibly_damaging(0.597) | C:0.0018 | -          | -        | -      | C:0.01   | -        | -          |
| rs186592293 | SH3D19  | missense_variant                            | tolerated(0.09)   | possibly_damaging(0.657) | G:0.0005 | -          | G:0.0020 | -      | -        | -        | -          |
| rs377758866 | SH3D19  | missense_variant                            | tolerated(0.08)   | possibly_damaging(0.751) | -        | A:0.000227 | -        | -      | -        | -        | A:0        |
| rs145726735 | SH3D19  | missense_variant                            | deleterious(0.01) | probably_damaging(0.998) | -        | A:0        | -        | -      | -        | -        | A:0.000116 |
| rs146575678 | SH3D19  | missense_variant,splice_region_variant      | deleterious(0.03) | benign(0.077)            | A:0.0009 | A:0.003177 | A:0.0041 | -      | -        | -        | A:0        |
| rs201329549 | SH3D19  | missense_variant                            | tolerated(0.39)   | possibly_damaging(0.461) | -        | A:0        | -        | -      | -        | -        | A:0.000233 |
| rs367960670 | SH3D19  | missense_variant                            | deleterious(0)    | probably_damaging(1)     | -        | T:0.000227 | -        | -      | -        | -        | T:0        |
| rs78397848  | SH3D19  | missense_variant                            | deleterious(0)    | probably_damaging(0.98)  | G:0.0354 | G:0.001135 | G:0.01   | G:0.10 | G:0.07   | -        | G:0.000349 |
| rs111861991 | SH3D19  | missense_variant                            | tolerated(0.26)   | probably_damaging(0.933) | -        | -          | -        | -      | -        | -        | -          |
| rs146287053 | SH3D19  | missense_variant                            | deleterious(0.01) | probably_damaging(0.946) | -        | A:0        | -        | -      | -        | -        | A:0.000233 |
| rs377710335 | SH3D19  | missense_variant                            | deleterious(0)    | probably_damaging(0.928) | -        | A:0.000227 | -        | -      | -        | -        | A:0        |
| rs186990819 | SH3D19  | missense_variant                            | deleterious(0.02) | probably_damaging(0.999) | T:0.0005 | -          | -        | -      | T:0.0017 | -        | -          |
| rs368920520 | SH3D19  | missense_variant                            | deleterious(0)    | probably_damaging(0.994) | -        | A:0.000227 | -        | -      | -        | -        | A:0        |
| rs202081191 | SH3D19  | missense_variant                            | deleterious(0.01) | benign(0.341)            | C:0.0005 | -          | C:0.0020 | -      | -        | -        | -          |
| rs143505993 | SH3D19  | missense_variant                            | deleterious(0)    | probably_damaging(0.996) | C:0.0009 | C:0.000227 | C:0.0041 | -      | -        | -        | C:0        |
| rs373289881 | SH3D19  | stop_gained                                 | -                 | -                        | -        | A:0        | -        | -      | -        | -        | A:0.000116 |
| rs34948591  | SH3D19  | frameshift_variant                          | -                 | -                        | -        | -          | -        | -      | -        | -        | -          |
| rs150966759 | SH3D19  | missense_variant                            | tolerated(0.13)   | probably_damaging(0.98)  | T:0.0005 | -          | T:0.0020 | -      | -        | -        | -          |
| rs142380318 | SH3D19  | missense_variant                            | deleterious(0)    | probably_damaging(0.964) | -        | A:0.000227 | -        | -      | -        | -        | A:0        |
| rs147933255 | SH3D19  | missense_variant                            | tolerated(0.12)   | possibly_damaging(0.836) | -        | A:0        | -        | -      | -        | -        | A:0.000116 |
| rs147501781 | SH3D19  | missense_variant                            | deleterious(0)    | benign(0.325)            | A:0.0018 | A:0.000908 | -        | A:0.01 | -        | A:0.0026 | A:0.003953 |
| rs201225279 | SH3D19  | missense_variant                            | deleterious(0.03) | probably_damaging(0.946) | T:0.0005 | -          | T:0.0020 | -      | -        | -        | -          |
| rs201831997 | SH3D19  | missense_variant                            | deleterious(0.01) | probably_damaging(0.987) | T:0.0009 | T:0.000227 | -        | -      | T:0.0035 | -        | T:0        |
| rs147112884 | SH3D19  | missense_variant                            | deleterious(0)    | probably_damaging(0.999) | -        | A:0        | -        | -      | -        | -        | A:0.000116 |
| rs371516037 | SH3D19  | missense_variant                            | deleterious(0)    | probably_damaging(1)     | -        | C:0        | -        | -      | -        | -        | C:0.000116 |
| rs201060063 | SH3D19  | missense_variant                            | deleterious(0)    | probably_damaging(0.994) | A:0.0000 | -          | -        | -      | -        | -        | -          |
| rs27273740  | SH3D19  | missense_variant                            | deleterious(0.04) | benign(0.027)            | C:0.0018 | C:0.000227 | -        | C:0.01 | -        | C:0.0026 | C:0.003721 |
| rs375856466 | SH3D19  | missense_variant                            | tolerated(0.1)    | possibly_damaging(0.623) | -        | G:0.000227 | -        | -      | -        | -        | G:0        |
| rs149484381 | SH3D19  | missense_variant                            | deleterious(0)    | probably_damaging(0.993) | -        | A:0        | -        | -      | -        | -        | A:0.000116 |
| rs139285387 | SH3D19  | splice_acceptor_variant,5_prime_UTR_variant | -                 | -                        | -        | -          | -        | -      | -        | -        | -          |
| rs183645038 | SH3D19  | splice_region_variant,intron_variant        | -                 | -                        | T:0.0005 | -          | -        | -      | T:0.0017 | -        | -          |
